# Supplementary material for: Meta-Research: Understudied genes are lost in a leaky pipeline between genome-wide assays and reporting of results
Source: eLife. 2024 Mar 28;12:RP93429. doi: 10.7554/eLife.93429 (PMC10977968; doi:10.7554/eLife.93429)
Supplement: Supplementary file 6. [file elife-93429-supp6.csv]

gene_ncbi	pubmed_id	mentioned	mentioned_citations	hit	type
9722	16648850	TRUE	TRUE	TRUE	gwas
5654	17053108	TRUE	TRUE	TRUE	gwas
79068	17434869	TRUE	TRUE	TRUE	gwas
54901	17460697	TRUE	TRUE	TRUE	gwas
6934	17460697	FALSE	TRUE	TRUE	gwas
160851	17486107	TRUE	TRUE	TRUE	gwas
2263	17529973	TRUE	TRUE	TRUE	gwas
9846	17553421	TRUE	TRUE	TRUE	gwas
6928	17603485	TRUE	TRUE	TRUE	gwas
64241	17632509	TRUE	TRUE	TRUE	gwas
723961	17632545	FALSE	FALSE	TRUE	gwas
23274	17632545	TRUE	TRUE	TRUE	gwas
79068	17658951	TRUE	TRUE	TRUE	gwas
4016	17690259	TRUE	TRUE	TRUE	gwas
8091	17767157	TRUE	TRUE	TRUE	gwas
7185	17804836	TRUE	TRUE	TRUE	gwas
26191	17804836	FALSE	TRUE	TRUE	gwas
4092	17934461	TRUE	TRUE	TRUE	gwas
56606	17997608	TRUE	TRUE	TRUE	gwas
1804	18084291	TRUE	TRUE	TRUE	gwas
55245	18193045	TRUE	TRUE	TRUE	gwas
23387	18193046	FALSE	FALSE	TRUE	gwas
51085	18193046	TRUE	TRUE	TRUE	gwas
4023	18193046	FALSE	TRUE	TRUE	gwas
640	18204098	TRUE	TRUE	TRUE	gwas
6775	18204098	FALSE	TRUE	TRUE	gwas
3117	18204098	FALSE	TRUE	TRUE	gwas
3687	18204098	FALSE	TRUE	TRUE	gwas
54899	18204446	TRUE	TRUE	TRUE	gwas
3684	18204446	TRUE	TRUE	TRUE	gwas
57661	18204446	FALSE	TRUE	TRUE	gwas
4439	18204446	FALSE	FALSE	TRUE	gwas
55024	18204447	TRUE	TRUE	TRUE	gwas
285498	18239089	TRUE	TRUE	TRUE	gwas
8924	18252221	TRUE	TRUE	TRUE	gwas
56606	18327256	TRUE	TRUE	TRUE	gwas
56606	18327257	TRUE	TRUE	TRUE	gwas
6927	18439548	TRUE	TRUE	TRUE	gwas
3953	18439548	TRUE	TRUE	TRUE	gwas
3570	18439548	TRUE	TRUE	TRUE	gwas
2646	18439548	TRUE	TRUE	TRUE	gwas
348	18439548	FALSE	TRUE	TRUE	gwas
64897	18439552	FALSE	FALSE	TRUE	gwas
6927	18439552	TRUE	TRUE	TRUE	gwas
57818	18451265	TRUE	TRUE	TRUE	gwas
57405	18451265	FALSE	FALSE	TRUE	gwas
28	18604267	TRUE	TRUE	TRUE	gwas
3383	18604267	FALSE	TRUE	TRUE	gwas
10599	18650507	TRUE	TRUE	TRUE	gwas
5789	18660810	TRUE	TRUE	TRUE	gwas
288	18711365	TRUE	TRUE	TRUE	gwas
3784	18711366	TRUE	TRUE	TRUE	gwas
10644	18711366	FALSE	TRUE	TRUE	gwas
54901	18711366	FALSE	TRUE	TRUE	gwas
3784	18711367	TRUE	TRUE	TRUE	gwas
56606	18759275	TRUE	TRUE	TRUE	gwas
2524	18776911	TRUE	TRUE	TRUE	gwas
2205	18846228	TRUE	TRUE	TRUE	gwas
10111	18846228	FALSE	TRUE	TRUE	gwas
221895	18952825	TRUE	TRUE	TRUE	gwas
4544	19060907	TRUE	TRUE	TRUE	gwas
57818	19060907	FALSE	TRUE	TRUE	gwas
57405	19060907	FALSE	FALSE	TRUE	gwas
2645	19060907	FALSE	TRUE	TRUE	gwas
7018	19084217	FALSE	TRUE	TRUE	gwas
58477	19084217	FALSE	FALSE	TRUE	gwas
3077	19084217	TRUE	TRUE	TRUE	gwas
57405	19096518	FALSE	FALSE	TRUE	gwas
169026	19096518	FALSE	TRUE	TRUE	gwas
3098	19096518	TRUE	TRUE	TRUE	gwas
2645	19096518	FALSE	TRUE	TRUE	gwas
81037	19151717	TRUE	TRUE	TRUE	gwas
9370	19165155	TRUE	TRUE	TRUE	gwas
7128	19165918	TRUE	TRUE	TRUE	gwas
640	19165918	FALSE	TRUE	TRUE	gwas
6775	19165918	FALSE	TRUE	TRUE	gwas
84894	19182806	TRUE	TRUE	TRUE	gwas
5979	19196962	FALSE	TRUE	TRUE	gwas
3084	19196962	TRUE	TRUE	TRUE	gwas
5649	19230858	TRUE	TRUE	TRUE	gwas
170692	19249006	TRUE	FALSE	TRUE	gwas
7201	19268274	TRUE	TRUE	TRUE	gwas
28	19278955	TRUE	TRUE	TRUE	gwas
8529	19300499	TRUE	TRUE	TRUE	gwas
1559	19300499	TRUE	TRUE	TRUE	gwas
3115	19349983	TRUE	TRUE	TRUE	gwas
53353	19367585	TRUE	TRUE	TRUE	gwas
580	19412175	TRUE	TRUE	TRUE	gwas
5144	19426955	TRUE	TRUE	TRUE	gwas
389421	19448623	TRUE	TRUE	TRUE	gwas
22920	19451621	TRUE	TRUE	TRUE	gwas
3595	19458352	TRUE	TRUE	TRUE	gwas
4254	19483682	TRUE	TRUE	TRUE	gwas
923	19525953	TRUE	TRUE	TRUE	gwas
7132	19525953	TRUE	TRUE	TRUE	gwas
965	19525953	FALSE	TRUE	TRUE	gwas
3134	19525953	FALSE	TRUE	TRUE	gwas
23562	19561606	TRUE	TRUE	TRUE	gwas
463	19597491	TRUE	TRUE	TRUE	gwas
463	19597492	TRUE	TRUE	TRUE	gwas
217	19698717	TRUE	TRUE	TRUE	gwas
125	19698717	TRUE	TRUE	TRUE	gwas
283383	19729412	TRUE	TRUE	TRUE	gwas
164656	19820698	TRUE	TRUE	TRUE	gwas
164656	19820699	TRUE	TRUE	TRUE	gwas
3077	19820699	FALSE	TRUE	TRUE	gwas
9474	19838195	FALSE	TRUE	TRUE	gwas
3684	19838195	FALSE	TRUE	TRUE	gwas
221895	19838195	TRUE	TRUE	TRUE	gwas
54887	19838195	TRUE	TRUE	TRUE	gwas
10318	19838195	TRUE	TRUE	TRUE	gwas
26191	19838195	FALSE	FALSE	TRUE	gwas
3663	19838195	FALSE	TRUE	TRUE	gwas
3122	19838195	FALSE	TRUE	TRUE	gwas
6775	19838195	FALSE	TRUE	TRUE	gwas
7128	19838195	FALSE	TRUE	TRUE	gwas
57661	19838195	FALSE	TRUE	TRUE	gwas
360203	19897590	TRUE	TRUE	TRUE	gwas
54622	20011104	TRUE	TRUE	TRUE	gwas
9370	20018283	TRUE	TRUE	TRUE	gwas
326624	20031577	FALSE	FALSE	TRUE	gwas
146722	20031577	FALSE	FALSE	TRUE	gwas
2244	20031577	TRUE	TRUE	TRUE	gwas
3570	20031577	FALSE	TRUE	TRUE	gwas
1373	20031577	FALSE	TRUE	TRUE	gwas
1282	20031579	TRUE	TRUE	TRUE	gwas
1636	20066004	TRUE	TRUE	TRUE	gwas
501	20072603	TRUE	TRUE	TRUE	gwas
2696	20081857	TRUE	TRUE	TRUE	gwas
2646	20081857	FALSE	TRUE	TRUE	gwas
111	20081857	FALSE	TRUE	TRUE	gwas
182	20096396	TRUE	TRUE	TRUE	gwas
83875	20150558	TRUE	FALSE	TRUE	gwas
3606	20150558	TRUE	TRUE	TRUE	gwas
1373	20154341	TRUE	TRUE	TRUE	gwas
6774	20159113	TRUE	TRUE	TRUE	gwas
3953	20167575	TRUE	TRUE	TRUE	gwas
2113	20169177	TRUE	TRUE	TRUE	gwas
57705	20169177	TRUE	TRUE	TRUE	gwas
5332	20172861	TRUE	FALSE	TRUE	gwas
3704	20173735	TRUE	TRUE	TRUE	gwas
3782	20173747	TRUE	TRUE	TRUE	gwas
10144	20173748	TRUE	TRUE	TRUE	gwas
3658	20173748	FALSE	TRUE	TRUE	gwas
5324	20189936	FALSE	TRUE	TRUE	gwas
169714	20189936	TRUE	TRUE	TRUE	gwas
253461	20189936	FALSE	FALSE	TRUE	gwas
3479	20189936	TRUE	TRUE	TRUE	gwas
2202	20189936	FALSE	FALSE	TRUE	gwas
129563	20189936	FALSE	FALSE	TRUE	gwas
725	20212171	TRUE	TRUE	TRUE	gwas
3586	20228798	FALSE	TRUE	TRUE	gwas
23252	20228798	FALSE	FALSE	TRUE	gwas
400935	20228798	TRUE	TRUE	TRUE	gwas
3273	20303064	TRUE	TRUE	TRUE	gwas
3827	20303064	TRUE	TRUE	TRUE	gwas
2870	20303064	FALSE	FALSE	TRUE	gwas
55133	20363506	TRUE	TRUE	TRUE	gwas
111	20372150	TRUE	TRUE	TRUE	gwas
6775	20383147	FALSE	TRUE	TRUE	gwas
919	20383147	TRUE	TRUE	TRUE	gwas
79991	20421499	TRUE	TRUE	TRUE	gwas
8882	20442857	FALSE	FALSE	TRUE	gwas
7941	20442857	TRUE	TRUE	TRUE	gwas
949	20442857	FALSE	TRUE	TRUE	gwas
1235	20453841	TRUE	TRUE	TRUE	gwas
55729	20543847	TRUE	TRUE	TRUE	gwas
1761	20543847	TRUE	TRUE	TRUE	gwas
4254	20543847	FALSE	TRUE	TRUE	gwas
7015	20543847	TRUE	TRUE	TRUE	gwas
2524	20570966	TRUE	TRUE	TRUE	gwas
64127	20570966	FALSE	FALSE	TRUE	gwas
3586	20622878	TRUE	TRUE	TRUE	gwas
29949	20622878	FALSE	FALSE	TRUE	gwas
153090	20622881	TRUE	TRUE	TRUE	gwas
846	20661308	TRUE	TRUE	TRUE	gwas
7369	20686651	TRUE	TRUE	TRUE	gwas
3117	20694011	FALSE	TRUE	TRUE	gwas
64135	20694011	TRUE	TRUE	TRUE	gwas
846	20705733	TRUE	TRUE	TRUE	gwas
1289	20719862	TRUE	TRUE	TRUE	gwas
387715	20861866	FALSE	FALSE	TRUE	gwas
718	20861866	FALSE	TRUE	TRUE	gwas
6499	20861866	TRUE	TRUE	TRUE	gwas
8626	20871597	TRUE	TRUE	TRUE	gwas
7015	20871597	FALSE	TRUE	TRUE	gwas
10758	20953186	TRUE	TRUE	TRUE	gwas
4137	21044948	FALSE	TRUE	TRUE	gwas
6622	21044948	TRUE	TRUE	TRUE	gwas
1997	21044949	TRUE	FALSE	TRUE	gwas
57674	21048783	TRUE	TRUE	TRUE	gwas
5046	21051773	TRUE	TRUE	TRUE	gwas
7369	21082022	TRUE	TRUE	TRUE	gwas
139189	21113153	TRUE	TRUE	TRUE	gwas
4004	21124317	TRUE	TRUE	TRUE	gwas
580	21124317	FALSE	TRUE	TRUE	gwas
10786	21149283	FALSE	FALSE	TRUE	gwas
9159	21149283	TRUE	TRUE	TRUE	gwas
6568	21149283	FALSE	FALSE	TRUE	gwas
164656	21149283	FALSE	TRUE	TRUE	gwas
23387	21149283	FALSE	FALSE	TRUE	gwas
6928	21160077	FALSE	FALSE	TRUE	gwas
354	21160077	TRUE	TRUE	TRUE	gwas
81037	21160077	FALSE	TRUE	TRUE	gwas
4477	21160077	FALSE	FALSE	TRUE	gwas
64897	21203500	FALSE	FALSE	TRUE	gwas
2530	21203500	FALSE	FALSE	TRUE	gwas
6927	21203500	TRUE	TRUE	TRUE	gwas
4684	21212386	TRUE	TRUE	TRUE	gwas
28	21239051	TRUE	TRUE	TRUE	gwas
11173	21239051	TRUE	TRUE	TRUE	gwas
1185	21273288	TRUE	TRUE	TRUE	gwas
150962	21298027	TRUE	TRUE	TRUE	gwas
220202	21307088	TRUE	TRUE	TRUE	gwas
80864	21323541	FALSE	FALSE	TRUE	gwas
389376	21323541	FALSE	FALSE	TRUE	gwas
6048	21323541	FALSE	FALSE	TRUE	gwas
10919	21323541	FALSE	FALSE	TRUE	gwas
135656	21323541	FALSE	FALSE	TRUE	gwas
10665	21323541	FALSE	FALSE	TRUE	gwas
7916	21323541	FALSE	FALSE	TRUE	gwas
3117	21323541	TRUE	TRUE	TRUE	gwas
22925	21323541	TRUE	TRUE	TRUE	gwas
7918	21323541	FALSE	FALSE	TRUE	gwas
56244	21323541	FALSE	FALSE	TRUE	gwas
5460	21323541	FALSE	FALSE	TRUE	gwas
170679	21323541	FALSE	FALSE	TRUE	gwas
8859	21323541	FALSE	FALSE	TRUE	gwas
6941	21323541	FALSE	FALSE	TRUE	gwas
8029	21355061	TRUE	TRUE	TRUE	gwas
196	21357676	TRUE	TRUE	TRUE	gwas
217	21372407	TRUE	TRUE	TRUE	gwas
160762	21372407	FALSE	FALSE	TRUE	gwas
1378	21460840	FALSE	TRUE	TRUE	gwas
10347	21460840	TRUE	TRUE	TRUE	gwas
26053	21471458	TRUE	TRUE	TRUE	gwas
27185	21483430	TRUE	TRUE	TRUE	gwas
196	21490707	TRUE	TRUE	TRUE	gwas
117583	21502085	TRUE	FALSE	TRUE	gwas
23569	21505073	FALSE	FALSE	TRUE	gwas
326	21505073	TRUE	TRUE	TRUE	gwas
28	21533024	FALSE	TRUE	TRUE	gwas
3383	21533024	TRUE	TRUE	TRUE	gwas
1761	21551455	TRUE	TRUE	TRUE	gwas
348751	21573128	TRUE	TRUE	TRUE	gwas
3988	21606135	TRUE	TRUE	TRUE	gwas
65992	21659334	TRUE	TRUE	TRUE	gwas
2475	21665993	TRUE	FALSE	TRUE	gwas
7018	21665994	TRUE	TRUE	TRUE	gwas
58477	21665994	FALSE	TRUE	TRUE	gwas
3077	21665994	FALSE	TRUE	TRUE	gwas
3778	21708048	TRUE	FALSE	TRUE	gwas
9681	21725309	TRUE	TRUE	TRUE	gwas
51752	21743469	TRUE	TRUE	TRUE	gwas
149233	21743469	FALSE	TRUE	TRUE	gwas
23046	21743469	FALSE	TRUE	TRUE	gwas
6563	21750109	TRUE	FALSE	TRUE	gwas
170680	21750679	FALSE	FALSE	TRUE	gwas
170679	21750679	TRUE	TRUE	TRUE	gwas
10318	21750679	TRUE	TRUE	TRUE	gwas
6775	21750679	FALSE	TRUE	TRUE	gwas
1012	21771975	TRUE	TRUE	TRUE	gwas
164656	21785125	TRUE	TRUE	TRUE	gwas
7018	21785125	FALSE	TRUE	TRUE	gwas
3077	21785125	TRUE	FALSE	TRUE	gwas
8028	21804547	TRUE	TRUE	TRUE	gwas
6563	21824976	TRUE	FALSE	TRUE	gwas
55937	21844665	TRUE	TRUE	TRUE	gwas
10152	21862451	FALSE	FALSE	TRUE	gwas
6051	21862451	FALSE	FALSE	TRUE	gwas
590	21862451	TRUE	TRUE	TRUE	gwas
23263	21871595	TRUE	TRUE	TRUE	gwas
4018	21900290	TRUE	TRUE	TRUE	gwas
5340	21900290	FALSE	FALSE	TRUE	gwas
3570	21907864	TRUE	TRUE	TRUE	gwas
64897	21908519	FALSE	FALSE	TRUE	gwas
2530	21908519	FALSE	FALSE	TRUE	gwas
27087	21908519	TRUE	FALSE	TRUE	gwas
6927	21908519	FALSE	TRUE	TRUE	gwas
4249	21908519	TRUE	FALSE	TRUE	gwas
2200	21909107	TRUE	TRUE	TRUE	gwas
7157	21946351	TRUE	TRUE	TRUE	gwas
83990	21964575	TRUE	TRUE	TRUE	gwas
51196	22001756	FALSE	TRUE	TRUE	gwas
4277	22001756	TRUE	TRUE	TRUE	gwas
1952	22003152	FALSE	FALSE	TRUE	gwas
8882	22003152	FALSE	TRUE	TRUE	gwas
7941	22003152	TRUE	TRUE	TRUE	gwas
3949	22003152	FALSE	FALSE	TRUE	gwas
2903	22004137	TRUE	FALSE	TRUE	gwas
7015	22037553	TRUE	TRUE	TRUE	gwas
4035	22055160	TRUE	TRUE	TRUE	gwas
1012	22065538	TRUE	TRUE	TRUE	gwas
1356	22075249	TRUE	TRUE	TRUE	gwas
2212	22081228	TRUE	TRUE	TRUE	gwas
79934	22081228	FALSE	FALSE	TRUE	gwas
80271	22081228	FALSE	TRUE	TRUE	gwas
5800	22126837	TRUE	TRUE	TRUE	gwas
9108	22137330	TRUE	FALSE	TRUE	gwas
5621	22137330	FALSE	FALSE	TRUE	gwas
5156	22144915	TRUE	TRUE	TRUE	gwas
54901	22290723	TRUE	TRUE	TRUE	gwas
4299	22291604	TRUE	TRUE	TRUE	gwas
9734	22306652	TRUE	TRUE	TRUE	gwas
1959	22327514	TRUE	TRUE	TRUE	gwas
5077	22341974	TRUE	FALSE	TRUE	gwas
56261	22343285	TRUE	FALSE	TRUE	gwas
4018	22368281	TRUE	TRUE	TRUE	gwas
2066	22452962	TRUE	TRUE	TRUE	gwas
286	22456796	TRUE	TRUE	TRUE	gwas
5184	22479202	FALSE	FALSE	TRUE	gwas
26354	22479202	FALSE	FALSE	TRUE	gwas
1012	22479202	FALSE	TRUE	TRUE	gwas
80790	22479202	FALSE	TRUE	TRUE	gwas
55193	22479202	FALSE	FALSE	TRUE	gwas
9370	22479202	TRUE	TRUE	TRUE	gwas
23545	22479202	FALSE	FALSE	TRUE	gwas
54657	22511988	FALSE	FALSE	TRUE	gwas
54658	22511988	TRUE	TRUE	TRUE	gwas
54659	22511988	FALSE	FALSE	TRUE	gwas
54600	22511988	FALSE	FALSE	TRUE	gwas
54575	22511988	FALSE	FALSE	TRUE	gwas
54576	22511988	FALSE	FALSE	TRUE	gwas
54577	22511988	FALSE	FALSE	TRUE	gwas
54578	22511988	FALSE	FALSE	TRUE	gwas
54579	22511988	FALSE	FALSE	TRUE	gwas
6840	22550155	TRUE	TRUE	TRUE	gwas
407977	22558069	FALSE	FALSE	TRUE	gwas
8741	22558069	TRUE	TRUE	TRUE	gwas
2646	22558069	FALSE	FALSE	TRUE	gwas
23495	22558069	TRUE	FALSE	TRUE	gwas
10714	22634755	TRUE	TRUE	TRUE	gwas
4935	22634755	FALSE	FALSE	TRUE	gwas
23495	22673310	TRUE	FALSE	TRUE	gwas
169026	22693455	FALSE	FALSE	TRUE	gwas
10644	22693455	FALSE	FALSE	TRUE	gwas
54901	22693455	FALSE	TRUE	TRUE	gwas
6934	22693455	FALSE	TRUE	TRUE	gwas
284217	22693455	TRUE	FALSE	TRUE	gwas
10363	22693455	FALSE	TRUE	TRUE	gwas
79068	22693455	FALSE	FALSE	TRUE	gwas
387715	22694956	FALSE	TRUE	TRUE	gwas
7148	22694956	TRUE	TRUE	TRUE	gwas
629	22694956	FALSE	TRUE	TRUE	gwas
4855	22694956	TRUE	TRUE	TRUE	gwas
55289	22700719	FALSE	FALSE	TRUE	gwas
578	22700719	TRUE	FALSE	TRUE	gwas
57476	22700719	FALSE	FALSE	TRUE	gwas
3662	22700719	FALSE	FALSE	TRUE	gwas
9722	22726844	FALSE	FALSE	TRUE	gwas
6546	22726844	TRUE	TRUE	TRUE	gwas
3113	22737229	FALSE	TRUE	TRUE	gwas
3115	22737229	TRUE	TRUE	TRUE	gwas
221692	22745674	TRUE	TRUE	TRUE	gwas
51384	22792071	TRUE	TRUE	TRUE	gwas
2859	22821403	TRUE	TRUE	TRUE	gwas
6925	22821403	TRUE	TRUE	TRUE	gwas
55971	22829776	FALSE	TRUE	TRUE	gwas
10599	22829776	FALSE	TRUE	TRUE	gwas
221037	22829776	FALSE	TRUE	TRUE	gwas
7157	22829776	FALSE	FALSE	TRUE	gwas
2646	22829776	FALSE	FALSE	TRUE	gwas
6462	22829776	TRUE	TRUE	TRUE	gwas
123688	22837378	FALSE	FALSE	TRUE	gwas
3360	22837378	TRUE	TRUE	TRUE	gwas
4004	22941191	FALSE	TRUE	TRUE	gwas
580	22941191	FALSE	TRUE	TRUE	gwas
51144	22941191	FALSE	FALSE	TRUE	gwas
389421	22941191	TRUE	TRUE	TRUE	gwas
57531	22941191	TRUE	TRUE	TRUE	gwas
1012	22952603	TRUE	FALSE	TRUE	gwas
169792	22961080	FALSE	TRUE	TRUE	gwas
92002	22961080	FALSE	FALSE	TRUE	gwas
10125	22961080	TRUE	TRUE	TRUE	gwas
6928	22961080	FALSE	FALSE	TRUE	gwas
2869	22961080	TRUE	TRUE	TRUE	gwas
54901	22961080	FALSE	TRUE	TRUE	gwas
5444	22982463	TRUE	TRUE	TRUE	gwas
79068	22982992	TRUE	TRUE	TRUE	gwas
5450	23000144	TRUE	FALSE	TRUE	gwas
51300	23000144	FALSE	FALSE	TRUE	gwas
9966	23000144	TRUE	TRUE	TRUE	gwas
22806	23000144	FALSE	FALSE	TRUE	gwas
5890	23001122	TRUE	TRUE	TRUE	gwas
80169	23001564	TRUE	FALSE	TRUE	gwas
55892	23001564	FALSE	FALSE	TRUE	gwas
79991	23001564	FALSE	FALSE	TRUE	gwas
1232	23017229	FALSE	FALSE	TRUE	gwas
64170	23017229	FALSE	FALSE	TRUE	gwas
2532	23017229	TRUE	TRUE	TRUE	gwas
3305	23028341	FALSE	FALSE	TRUE	gwas
6891	23028341	FALSE	FALSE	TRUE	gwas
7148	23028341	FALSE	FALSE	TRUE	gwas
718	23028341	TRUE	TRUE	TRUE	gwas
4855	23028341	FALSE	FALSE	TRUE	gwas
2968	23028341	FALSE	FALSE	TRUE	gwas
259197	23028341	FALSE	FALSE	TRUE	gwas
4794	23028356	TRUE	TRUE	TRUE	gwas
219790	23028356	TRUE	TRUE	TRUE	gwas
10318	23055271	TRUE	TRUE	TRUE	gwas
26191	23055271	FALSE	TRUE	TRUE	gwas
10249	23108985	TRUE	FALSE	TRUE	gwas
643680	23118302	FALSE	FALSE	TRUE	gwas
1952	23118302	FALSE	FALSE	TRUE	gwas
7941	23118302	TRUE	TRUE	TRUE	gwas
81671	23118302	FALSE	FALSE	TRUE	gwas
51338	23118302	FALSE	FALSE	TRUE	gwas
4018	23118302	FALSE	FALSE	TRUE	gwas
949	23118302	FALSE	FALSE	TRUE	gwas
9429	23118302	FALSE	FALSE	TRUE	gwas
407977	23118916	FALSE	FALSE	TRUE	gwas
8741	23118916	TRUE	FALSE	TRUE	gwas
55733	23142968	TRUE	FALSE	TRUE	gwas
54209	23150908	TRUE	TRUE	TRUE	gwas
3117	23181788	TRUE	TRUE	TRUE	gwas
9839	23184150	TRUE	TRUE	TRUE	gwas
10599	23233662	TRUE	TRUE	TRUE	gwas
6775	23242368	TRUE	TRUE	TRUE	gwas
7139	23247143	TRUE	FALSE	TRUE	gwas
338	23247145	TRUE	TRUE	TRUE	gwas
64093	23263445	TRUE	FALSE	TRUE	gwas
7450	23267103	TRUE	TRUE	TRUE	gwas
28	23267103	FALSE	FALSE	TRUE	gwas
1027	23273568	TRUE	FALSE	TRUE	gwas
55332	23273568	TRUE	FALSE	TRUE	gwas
54887	23273568	FALSE	FALSE	TRUE	gwas
57705	23273568	FALSE	FALSE	TRUE	gwas
941	23273568	FALSE	FALSE	TRUE	gwas
1389	23273568	FALSE	FALSE	TRUE	gwas
6775	23273568	FALSE	FALSE	TRUE	gwas
7128	23273568	FALSE	TRUE	TRUE	gwas
2842	23273568	FALSE	FALSE	TRUE	gwas
84159	23273568	TRUE	TRUE	TRUE	gwas
2122	23349225	TRUE	FALSE	TRUE	gwas
55729	23359319	TRUE	FALSE	TRUE	gwas
26291	23372041	TRUE	TRUE	TRUE	gwas
259266	23381943	FALSE	FALSE	TRUE	gwas
2155	23381943	FALSE	FALSE	TRUE	gwas
5004	23381943	FALSE	FALSE	TRUE	gwas
2159	23381943	FALSE	FALSE	TRUE	gwas
2162	23381943	FALSE	FALSE	TRUE	gwas
81494	23381943	FALSE	FALSE	TRUE	gwas
360023	23381943	FALSE	FALSE	TRUE	gwas
28	23381943	TRUE	TRUE	TRUE	gwas
10877	23381943	FALSE	FALSE	TRUE	gwas
23263	23381943	FALSE	FALSE	TRUE	gwas
4745	23400010	TRUE	FALSE	TRUE	gwas
5819	23419831	FALSE	FALSE	TRUE	gwas
10452	23419831	FALSE	TRUE	TRUE	gwas
348	23419831	TRUE	TRUE	TRUE	gwas
84700	23423138	TRUE	TRUE	TRUE	gwas
347735	23455491	TRUE	TRUE	TRUE	gwas
152330	23471985	FALSE	FALSE	TRUE	gwas
10418	23471985	TRUE	TRUE	TRUE	gwas
6869	23471985	FALSE	FALSE	TRUE	gwas
55222	23471985	FALSE	FALSE	TRUE	gwas
7319	23471985	FALSE	FALSE	TRUE	gwas
4734	23471985	FALSE	FALSE	TRUE	gwas
6850	23480133	TRUE	FALSE	TRUE	gwas
54986	23502783	FALSE	FALSE	TRUE	gwas
595	23502783	TRUE	TRUE	TRUE	gwas
23492	23502783	FALSE	FALSE	TRUE	gwas
8701	23502783	FALSE	FALSE	TRUE	gwas
80339	23535911	TRUE	TRUE	TRUE	gwas
5819	23565137	FALSE	FALSE	TRUE	gwas
6653	23565137	TRUE	TRUE	TRUE	gwas
10347	23571587	TRUE	TRUE	TRUE	gwas
4208	23572186	TRUE	TRUE	TRUE	gwas
283450	23575436	TRUE	FALSE	TRUE	gwas
2645	23575436	FALSE	FALSE	TRUE	gwas
4938	23575436	FALSE	FALSE	TRUE	gwas
54901	23575436	FALSE	FALSE	TRUE	gwas
25800	23644492	TRUE	TRUE	TRUE	gwas
3781	23677057	TRUE	FALSE	TRUE	gwas
3115	23740775	TRUE	TRUE	TRUE	gwas
6336	23872634	TRUE	TRUE	TRUE	gwas
6331	23872634	TRUE	TRUE	TRUE	gwas
25825	23903356	TRUE	FALSE	TRUE	gwas
5122	23903356	FALSE	FALSE	TRUE	gwas
80201	23903356	TRUE	TRUE	TRUE	gwas
2646	23903356	FALSE	FALSE	TRUE	gwas
57818	23903356	FALSE	FALSE	TRUE	gwas
57405	23903356	FALSE	FALSE	TRUE	gwas
6641	23933737	FALSE	TRUE	TRUE	gwas
9839	23933737	TRUE	TRUE	TRUE	gwas
9679	23958962	TRUE	FALSE	TRUE	gwas
3554	23999434	FALSE	TRUE	TRUE	gwas
8807	23999434	FALSE	TRUE	TRUE	gwas
8808	23999434	FALSE	FALSE	TRUE	gwas
8809	23999434	FALSE	TRUE	TRUE	gwas
9173	23999434	TRUE	TRUE	TRUE	gwas
389015	23999434	FALSE	FALSE	TRUE	gwas
6323	24014518	TRUE	TRUE	TRUE	gwas
3949	24046328	TRUE	TRUE	TRUE	gwas
222256	24241537	TRUE	TRUE	TRUE	gwas
55876	24241537	FALSE	FALSE	TRUE	gwas
284110	24241537	FALSE	FALSE	TRUE	gwas
217	24277619	TRUE	FALSE	TRUE	gwas
284371	24280104	FALSE	FALSE	TRUE	gwas
9668	24280104	TRUE	FALSE	TRUE	gwas
80110	24280104	FALSE	FALSE	TRUE	gwas
6934	24322204	TRUE	TRUE	TRUE	gwas
287015	24322204	FALSE	FALSE	TRUE	gwas
2524	24326010	TRUE	TRUE	TRUE	gwas
22901	24375517	TRUE	TRUE	TRUE	gwas
3784	24390345	FALSE	FALSE	TRUE	gwas
162515	24390345	TRUE	TRUE	TRUE	gwas
6934	24390345	FALSE	TRUE	TRUE	gwas
7053	24403052	TRUE	TRUE	TRUE	gwas
81037	24403052	FALSE	TRUE	TRUE	gwas
7157	24403052	FALSE	FALSE	TRUE	gwas
26166	24403052	TRUE	TRUE	TRUE	gwas
353238	24403052	FALSE	FALSE	TRUE	gwas
4092	24448986	TRUE	TRUE	TRUE	gwas
5423	24578379	FALSE	FALSE	TRUE	gwas
134957	24578379	TRUE	TRUE	TRUE	gwas
2054	24578379	FALSE	FALSE	TRUE	gwas
5327	24578379	FALSE	FALSE	TRUE	gwas
8997	24586183	FALSE	FALSE	TRUE	gwas
7173	24586183	TRUE	TRUE	TRUE	gwas
6311	24586183	FALSE	FALSE	TRUE	gwas
260425	24586183	FALSE	FALSE	TRUE	gwas
60468	24586183	FALSE	TRUE	TRUE	gwas
10057	24603532	TRUE	TRUE	TRUE	gwas
10840	24651765	TRUE	TRUE	TRUE	gwas
5723	24651765	FALSE	FALSE	TRUE	gwas
875	24651765	FALSE	FALSE	TRUE	gwas
1373	24651765	FALSE	TRUE	TRUE	gwas
8854	24728293	TRUE	TRUE	TRUE	gwas
2638	24740207	TRUE	TRUE	TRUE	gwas
10452	24770881	FALSE	FALSE	TRUE	gwas
10060	24770881	TRUE	TRUE	TRUE	gwas
1459	24795349	TRUE	FALSE	TRUE	gwas
51750	24908248	FALSE	TRUE	TRUE	gwas
79782	24908248	FALSE	FALSE	TRUE	gwas
7015	24908248	TRUE	TRUE	TRUE	gwas
8315	24916648	FALSE	TRUE	TRUE	gwas
23228	24916648	TRUE	FALSE	TRUE	gwas
8943	24916648	TRUE	FALSE	TRUE	gwas
354	24919509	TRUE	TRUE	TRUE	gwas
85414	24919509	FALSE	FALSE	TRUE	gwas
23025	24931836	TRUE	TRUE	TRUE	gwas
203228	24931836	TRUE	FALSE	TRUE	gwas
1471	24952865	TRUE	TRUE	TRUE	gwas
2475	24963161	FALSE	FALSE	TRUE	gwas
5949	24963161	TRUE	FALSE	TRUE	gwas
8801	25027320	TRUE	TRUE	TRUE	gwas
348	25027320	FALSE	TRUE	TRUE	gwas
2524	25028398	TRUE	FALSE	TRUE	gwas
28	25028398	FALSE	TRUE	TRUE	gwas
9882	25043022	TRUE	TRUE	TRUE	gwas
23387	25060954	TRUE	FALSE	TRUE	gwas
10144	25101718	FALSE	FALSE	TRUE	gwas
1138	25101718	FALSE	FALSE	TRUE	gwas
3658	25101718	TRUE	FALSE	TRUE	gwas
55270	25108385	TRUE	TRUE	TRUE	gwas
5378	25162662	TRUE	FALSE	TRUE	gwas
60312	25173105	TRUE	TRUE	TRUE	gwas
2762	25173105	TRUE	TRUE	TRUE	gwas
10990	25214527	TRUE	FALSE	TRUE	gwas
1158	25214527	TRUE	TRUE	TRUE	gwas
1879	25271088	TRUE	TRUE	TRUE	gwas
6499	25281659	FALSE	FALSE	TRUE	gwas
8200	25281659	FALSE	FALSE	TRUE	gwas
64399	25281659	FALSE	FALSE	TRUE	gwas
176	25281659	FALSE	FALSE	TRUE	gwas
57169	25281659	FALSE	FALSE	TRUE	gwas
10903	25281659	FALSE	FALSE	TRUE	gwas
127579	25281659	TRUE	FALSE	TRUE	gwas
3709	25303641	TRUE	TRUE	TRUE	gwas
84159	25310577	TRUE	TRUE	TRUE	gwas
22868	25385369	TRUE	FALSE	TRUE	gwas
56952	25456346	TRUE	FALSE	TRUE	gwas
54901	25483131	TRUE	TRUE	TRUE	gwas
22920	25576479	FALSE	FALSE	TRUE	gwas
6402	25576479	TRUE	TRUE	TRUE	gwas
55732	25576479	FALSE	FALSE	TRUE	gwas
3112	25604533	FALSE	FALSE	TRUE	gwas
3569	25604533	TRUE	TRUE	TRUE	gwas
6203	25604533	TRUE	FALSE	TRUE	gwas
170679	25604533	FALSE	FALSE	TRUE	gwas
23365	25637523	TRUE	FALSE	TRUE	gwas
10458	25676789	FALSE	FALSE	TRUE	gwas
9429	25676789	TRUE	TRUE	TRUE	gwas
22913	25705849	FALSE	FALSE	TRUE	gwas
124045	25705849	FALSE	FALSE	TRUE	gwas
3662	25705849	TRUE	FALSE	TRUE	gwas
4016	25706626	FALSE	TRUE	TRUE	gwas
773	25706626	TRUE	FALSE	TRUE	gwas
57153	25772935	TRUE	TRUE	TRUE	gwas
23555	25772935	TRUE	FALSE	TRUE	gwas
2147	25772935	FALSE	TRUE	TRUE	gwas
2153	25772935	FALSE	TRUE	TRUE	gwas
10544	25772935	FALSE	FALSE	TRUE	gwas
2160	25772935	FALSE	TRUE	TRUE	gwas
28	25772935	FALSE	TRUE	TRUE	gwas
50807	25774636	TRUE	TRUE	TRUE	gwas
3111	25802187	FALSE	FALSE	TRUE	gwas
3113	25802187	FALSE	FALSE	TRUE	gwas
3115	25802187	FALSE	FALSE	TRUE	gwas
3120	25802187	FALSE	FALSE	TRUE	gwas
629	25802187	TRUE	FALSE	TRUE	gwas
4855	25802187	FALSE	FALSE	TRUE	gwas
958	25802187	FALSE	FALSE	TRUE	gwas
210	25820613	TRUE	TRUE	TRUE	gwas
54836	25820613	FALSE	FALSE	TRUE	gwas
7477	25823570	TRUE	TRUE	TRUE	gwas
1496	25839716	FALSE	FALSE	TRUE	gwas
1555	25839716	TRUE	FALSE	TRUE	gwas
253559	25869804	TRUE	TRUE	TRUE	gwas
2113	25920553	FALSE	FALSE	TRUE	gwas
84162	25920553	FALSE	FALSE	TRUE	gwas
25989	25920553	FALSE	FALSE	TRUE	gwas
4774	25920553	FALSE	FALSE	TRUE	gwas
3558	25920553	FALSE	FALSE	TRUE	gwas
6775	25920553	FALSE	FALSE	TRUE	gwas
940	25920553	FALSE	FALSE	TRUE	gwas
23187	25920553	FALSE	FALSE	TRUE	gwas
9844	25920553	FALSE	FALSE	TRUE	gwas
55765	25920553	FALSE	FALSE	TRUE	gwas
63925	25920553	TRUE	FALSE	TRUE	gwas
389015	25920553	FALSE	FALSE	TRUE	gwas
57178	25920553	FALSE	FALSE	TRUE	gwas
387357	25920553	FALSE	FALSE	TRUE	gwas
8464	25934476	TRUE	FALSE	TRUE	gwas
11093	25934476	TRUE	TRUE	TRUE	gwas
29989	25934476	FALSE	FALSE	TRUE	gwas
4773	25987655	TRUE	FALSE	TRUE	gwas
22936	26007630	TRUE	TRUE	TRUE	gwas
54986	26007630	FALSE	FALSE	TRUE	gwas
8701	26007630	FALSE	FALSE	TRUE	gwas
4582	26058915	TRUE	FALSE	TRUE	gwas
4781	26084801	TRUE	TRUE	TRUE	gwas
80333	26169577	TRUE	FALSE	TRUE	gwas
4255	26183928	TRUE	FALSE	TRUE	gwas
149111	26239289	TRUE	FALSE	TRUE	gwas
3556	26268530	TRUE	TRUE	TRUE	gwas
94120	26377243	FALSE	FALSE	TRUE	gwas
117289	26377243	FALSE	FALSE	TRUE	gwas
5071	26377243	FALSE	FALSE	TRUE	gwas
4018	26377243	TRUE	TRUE	TRUE	gwas
84947	26377243	FALSE	FALSE	TRUE	gwas
204801	26414677	FALSE	FALSE	TRUE	gwas
284417	26414677	FALSE	FALSE	TRUE	gwas
57605	26414677	FALSE	FALSE	TRUE	gwas
51720	26414677	FALSE	FALSE	TRUE	gwas
2956	26414677	FALSE	FALSE	TRUE	gwas
81550	26414677	FALSE	FALSE	TRUE	gwas
221711	26414677	FALSE	FALSE	TRUE	gwas
9874	26414677	FALSE	FALSE	TRUE	gwas
54933	26414677	FALSE	FALSE	TRUE	gwas
10521	26414677	FALSE	FALSE	TRUE	gwas
93210	26414677	FALSE	FALSE	TRUE	gwas
1820	26414677	FALSE	FALSE	TRUE	gwas
672	26414677	TRUE	TRUE	TRUE	gwas
84515	26414677	FALSE	TRUE	TRUE	gwas
23331	26414677	FALSE	FALSE	TRUE	gwas
11044	26414677	FALSE	FALSE	TRUE	gwas
84268	26414677	FALSE	FALSE	TRUE	gwas
5557	26414677	FALSE	FALSE	TRUE	gwas
8630	26414677	FALSE	FALSE	TRUE	gwas
22838	26414677	FALSE	FALSE	TRUE	gwas
54840	26414677	FALSE	FALSE	TRUE	gwas
4795	26414677	FALSE	FALSE	TRUE	gwas
121665	26414677	FALSE	FALSE	TRUE	gwas
9156	26414677	FALSE	FALSE	TRUE	gwas
64838	26414677	FALSE	FALSE	TRUE	gwas
28231	26414677	FALSE	FALSE	TRUE	gwas
11083	26414677	FALSE	FALSE	TRUE	gwas
80204	26414677	FALSE	FALSE	TRUE	gwas
55636	26414677	FALSE	FALSE	TRUE	gwas
4439	26414677	FALSE	FALSE	TRUE	gwas
54617	26414677	FALSE	FALSE	TRUE	gwas
91749	26414677	FALSE	FALSE	TRUE	gwas
113510	26414677	FALSE	FALSE	TRUE	gwas
29035	26414677	FALSE	FALSE	TRUE	gwas
9070	26414677	FALSE	FALSE	TRUE	gwas
10228	26414677	FALSE	FALSE	TRUE	gwas
10489	26414677	FALSE	FALSE	TRUE	gwas
54906	26414677	FALSE	FALSE	TRUE	gwas
92797	26414677	FALSE	FALSE	TRUE	gwas
2646	26433129	TRUE	TRUE	TRUE	gwas
123688	26440539	FALSE	FALSE	TRUE	gwas
1137	26440539	TRUE	TRUE	TRUE	gwas
57794	26482880	FALSE	FALSE	TRUE	gwas
80339	26482880	TRUE	TRUE	TRUE	gwas
55576	26486471	FALSE	TRUE	TRUE	gwas
7450	26486471	TRUE	TRUE	TRUE	gwas
28	26486471	FALSE	FALSE	TRUE	gwas
134957	26486471	FALSE	TRUE	TRUE	gwas
55504	26545403	FALSE	FALSE	TRUE	gwas
2122	26545403	FALSE	FALSE	TRUE	gwas
81037	26545403	TRUE	TRUE	TRUE	gwas
10019	26621817	TRUE	FALSE	TRUE	gwas
6311	26621817	FALSE	FALSE	TRUE	gwas
8312	26733130	FALSE	FALSE	TRUE	gwas
284067	26733130	FALSE	FALSE	TRUE	gwas
84870	26733130	FALSE	TRUE	TRUE	gwas
5727	26733130	TRUE	TRUE	TRUE	gwas
317761	26752265	FALSE	FALSE	TRUE	gwas
54499	26752265	FALSE	FALSE	TRUE	gwas
6311	26752265	TRUE	FALSE	TRUE	gwas
23414	26752265	FALSE	FALSE	TRUE	gwas
10587	26752265	TRUE	FALSE	TRUE	gwas
4990	26752265	FALSE	TRUE	TRUE	gwas
9159	26763881	TRUE	TRUE	TRUE	gwas
6876	26763881	FALSE	FALSE	TRUE	gwas
116519	26763881	FALSE	FALSE	TRUE	gwas
1373	26822151	TRUE	TRUE	TRUE	gwas
29958	26822151	FALSE	FALSE	TRUE	gwas
114880	26830138	TRUE	FALSE	TRUE	gwas
5793	26830138	TRUE	FALSE	TRUE	gwas
51520	26830138	FALSE	FALSE	TRUE	gwas
8867	26830138	FALSE	FALSE	TRUE	gwas
92293	26830138	FALSE	FALSE	TRUE	gwas
286183	26830138	FALSE	FALSE	TRUE	gwas
100288072	26830138	FALSE	FALSE	TRUE	gwas
9678	26830138	FALSE	FALSE	TRUE	gwas
2162	26830138	FALSE	FALSE	TRUE	gwas
54715	26830138	FALSE	FALSE	TRUE	gwas
221656	26830138	FALSE	FALSE	TRUE	gwas
50618	26830138	FALSE	FALSE	TRUE	gwas
2555	26830138	FALSE	FALSE	TRUE	gwas
79838	26830138	FALSE	FALSE	TRUE	gwas
2917	26856250	TRUE	FALSE	TRUE	gwas
1496	26911590	FALSE	FALSE	TRUE	gwas
79971	26911590	TRUE	TRUE	TRUE	gwas
10413	27018472	FALSE	FALSE	TRUE	gwas
57822	27018472	TRUE	TRUE	TRUE	gwas
5071	27018472	FALSE	FALSE	TRUE	gwas
10512	27036123	FALSE	FALSE	TRUE	gwas
51129	27036123	TRUE	TRUE	TRUE	gwas
7158	27036123	FALSE	FALSE	TRUE	gwas
55697	27143689	TRUE	FALSE	TRUE	gwas
2120	27145994	TRUE	TRUE	TRUE	gwas
7332	27193031	FALSE	FALSE	TRUE	gwas
57511	27193031	TRUE	FALSE	TRUE	gwas
23534	27193031	FALSE	FALSE	TRUE	gwas
26191	27193031	FALSE	TRUE	TRUE	gwas
3385	27193031	FALSE	FALSE	TRUE	gwas
10913	27193062	TRUE	FALSE	TRUE	gwas
8464	27193062	FALSE	FALSE	TRUE	gwas
2737	27193062	TRUE	FALSE	TRUE	gwas
5077	27193062	FALSE	FALSE	TRUE	gwas
860	27193062	TRUE	FALSE	TRUE	gwas
3416	27244217	FALSE	FALSE	TRUE	gwas
23261	27244217	TRUE	FALSE	TRUE	gwas
596	27416945	TRUE	FALSE	TRUE	gwas
91133	27480026	TRUE	FALSE	TRUE	gwas
10913	27487801	TRUE	FALSE	TRUE	gwas
1548	27488534	TRUE	TRUE	TRUE	gwas
1549	27488534	FALSE	FALSE	TRUE	gwas
6514	27500523	TRUE	TRUE	TRUE	gwas
64077	27531626	TRUE	FALSE	TRUE	gwas
79068	27558924	TRUE	TRUE	TRUE	gwas
55270	27558924	FALSE	TRUE	TRUE	gwas
126147	27559109	FALSE	FALSE	TRUE	gwas
2524	27559109	TRUE	TRUE	TRUE	gwas
8452	27595289	FALSE	FALSE	TRUE	gwas
8997	27595289	FALSE	FALSE	TRUE	gwas
79750	27595289	FALSE	FALSE	TRUE	gwas
3115	27595289	TRUE	FALSE	TRUE	gwas
221935	27595289	FALSE	FALSE	TRUE	gwas
55051	27723756	FALSE	FALSE	TRUE	gwas
2317	27723756	FALSE	FALSE	TRUE	gwas
57619	27723756	FALSE	FALSE	TRUE	gwas
23315	27723756	FALSE	FALSE	TRUE	gwas
56606	27723756	FALSE	FALSE	TRUE	gwas
3752	27723756	FALSE	FALSE	TRUE	gwas
154664	27723756	FALSE	FALSE	TRUE	gwas
11057	27723756	FALSE	FALSE	TRUE	gwas
23094	27723756	FALSE	FALSE	TRUE	gwas
54984	27723756	FALSE	FALSE	TRUE	gwas
204	27723756	FALSE	FALSE	TRUE	gwas
9943	27723756	FALSE	FALSE	TRUE	gwas
64478	27723756	FALSE	FALSE	TRUE	gwas
51422	27723756	FALSE	FALSE	TRUE	gwas
4704	27723756	FALSE	FALSE	TRUE	gwas
54751	27723756	FALSE	FALSE	TRUE	gwas
3172	27723756	FALSE	FALSE	TRUE	gwas
23274	27723756	FALSE	FALSE	TRUE	gwas
57707	27723756	FALSE	FALSE	TRUE	gwas
55024	27723756	FALSE	FALSE	TRUE	gwas
10867	27723756	FALSE	FALSE	TRUE	gwas
27124	27723756	FALSE	FALSE	TRUE	gwas
7421	27723756	TRUE	TRUE	TRUE	gwas
145407	27723756	FALSE	FALSE	TRUE	gwas
2625	27723758	FALSE	FALSE	TRUE	gwas
64135	27723758	FALSE	FALSE	TRUE	gwas
23274	27723758	TRUE	FALSE	TRUE	gwas
3117	27723758	FALSE	FALSE	TRUE	gwas
54806	27723758	TRUE	FALSE	TRUE	gwas
2263	27764800	TRUE	TRUE	TRUE	gwas
1012	27911795	FALSE	FALSE	TRUE	gwas
152831	27911795	TRUE	TRUE	TRUE	gwas
150280	27941131	TRUE	FALSE	TRUE	gwas
2160	28053049	TRUE	TRUE	TRUE	gwas
3827	28053049	FALSE	FALSE	TRUE	gwas
57698	28054174	FALSE	FALSE	TRUE	gwas
9423	28054174	FALSE	FALSE	TRUE	gwas
8626	28054174	TRUE	TRUE	TRUE	gwas
24	28054174	FALSE	FALSE	TRUE	gwas
5081	28054174	FALSE	FALSE	TRUE	gwas
11259	28054174	FALSE	FALSE	TRUE	gwas
10620	28054174	FALSE	FALSE	TRUE	gwas
84319	28054174	FALSE	FALSE	TRUE	gwas
5450	28062665	FALSE	FALSE	TRUE	gwas
5579	28062665	TRUE	FALSE	TRUE	gwas
9966	28062665	FALSE	FALSE	TRUE	gwas
3122	28062665	FALSE	FALSE	TRUE	gwas
22806	28062665	FALSE	FALSE	TRUE	gwas
3575	28062665	FALSE	FALSE	TRUE	gwas
9031	28082259	FALSE	FALSE	TRUE	gwas
10544	28082259	FALSE	FALSE	TRUE	gwas
339761	28082259	FALSE	FALSE	TRUE	gwas
2646	28082259	FALSE	FALSE	TRUE	gwas
5624	28082259	TRUE	FALSE	TRUE	gwas
10746	28082259	FALSE	FALSE	TRUE	gwas
55741	28082259	FALSE	FALSE	TRUE	gwas
4137	28100725	TRUE	TRUE	TRUE	gwas
354	28139693	TRUE	FALSE	TRUE	gwas
26147	28139693	FALSE	FALSE	TRUE	gwas
2263	28139693	FALSE	FALSE	TRUE	gwas
85414	28139693	FALSE	FALSE	TRUE	gwas
221895	28139693	FALSE	FALSE	TRUE	gwas
3817	28139693	FALSE	FALSE	TRUE	gwas
55787	28139693	FALSE	FALSE	TRUE	gwas
6928	28139693	FALSE	FALSE	TRUE	gwas
253461	28139693	FALSE	FALSE	TRUE	gwas
5462	28139693	FALSE	FALSE	TRUE	gwas
53335	28139693	FALSE	FALSE	TRUE	gwas
10742	28139693	FALSE	FALSE	TRUE	gwas
55130	28139693	FALSE	FALSE	TRUE	gwas
4316	28139693	FALSE	TRUE	TRUE	gwas
4477	28139693	FALSE	FALSE	TRUE	gwas
7092	28163062	TRUE	TRUE	TRUE	gwas
7477	28171582	TRUE	TRUE	TRUE	gwas
5265	28265093	TRUE	FALSE	TRUE	gwas
5592	28265120	TRUE	TRUE	TRUE	gwas
4179	28289848	TRUE	FALSE	TRUE	gwas
10964	28289848	TRUE	TRUE	TRUE	gwas
10507	28296344	TRUE	FALSE	TRUE	gwas
150356	28319091	TRUE	FALSE	TRUE	gwas
348	28322283	FALSE	FALSE	TRUE	gwas
5789	28322283	TRUE	TRUE	TRUE	gwas
10725	28360221	TRUE	TRUE	TRUE	gwas
2147	28373160	FALSE	FALSE	TRUE	gwas
2153	28373160	FALSE	FALSE	TRUE	gwas
2160	28373160	FALSE	FALSE	TRUE	gwas
23414	28373160	TRUE	FALSE	TRUE	gwas
28	28373160	FALSE	FALSE	TRUE	gwas
131096	28374850	TRUE	FALSE	TRUE	gwas
2202	28374850	TRUE	FALSE	TRUE	gwas
10599	28429243	TRUE	TRUE	TRUE	gwas
81794	28441456	FALSE	FALSE	TRUE	gwas
158326	28441456	TRUE	FALSE	TRUE	gwas
5071	28441456	FALSE	FALSE	TRUE	gwas
27445	28540843	TRUE	FALSE	TRUE	gwas
27201	28545128	FALSE	FALSE	TRUE	gwas
4004	28545128	FALSE	FALSE	TRUE	gwas
389421	28545128	FALSE	FALSE	TRUE	gwas
8532	28545128	TRUE	TRUE	TRUE	gwas
7157	28545128	FALSE	FALSE	TRUE	gwas
51319	28545128	FALSE	TRUE	TRUE	gwas
55843	28585551	TRUE	TRUE	TRUE	gwas
8292	28585551	TRUE	FALSE	TRUE	gwas
1432	28672053	TRUE	FALSE	TRUE	gwas
54209	28714976	TRUE	TRUE	TRUE	gwas
1378	28714976	FALSE	FALSE	TRUE	gwas
1191	28714976	FALSE	FALSE	TRUE	gwas
274	28714976	FALSE	FALSE	TRUE	gwas
5336	28714976	TRUE	TRUE	TRUE	gwas
51225	28714976	TRUE	TRUE	TRUE	gwas
348	28714976	FALSE	FALSE	TRUE	gwas
509	28714976	FALSE	FALSE	TRUE	gwas
4036	28739605	TRUE	TRUE	TRUE	gwas
1504	28754779	TRUE	FALSE	TRUE	gwas
92129	28754779	FALSE	FALSE	TRUE	gwas
11330	28754779	FALSE	FALSE	TRUE	gwas
79589	28754779	FALSE	FALSE	TRUE	gwas
54885	28754779	FALSE	FALSE	TRUE	gwas
842	28754779	FALSE	FALSE	TRUE	gwas
139212	28754779	FALSE	FALSE	TRUE	gwas
5645	28754779	FALSE	FALSE	TRUE	gwas
84301	28754779	FALSE	FALSE	TRUE	gwas
54830	28754779	FALSE	FALSE	TRUE	gwas
5644	28754779	FALSE	FALSE	TRUE	gwas
9075	28754779	FALSE	FALSE	TRUE	gwas
63036	28754779	FALSE	FALSE	TRUE	gwas
79710	28754779	FALSE	FALSE	TRUE	gwas
9429	28776340	TRUE	FALSE	TRUE	gwas
723961	28838971	FALSE	FALSE	TRUE	gwas
3481	28838971	TRUE	TRUE	TRUE	gwas
9313	28924153	TRUE	TRUE	TRUE	gwas
580	28924153	FALSE	FALSE	TRUE	gwas
84059	28927820	TRUE	FALSE	TRUE	gwas
1789	28972577	TRUE	FALSE	TRUE	gwas
123688	29030599	FALSE	FALSE	TRUE	gwas
4018	29030599	TRUE	FALSE	TRUE	gwas
348	29030599	FALSE	FALSE	TRUE	gwas
80129	29058716	FALSE	FALSE	TRUE	gwas
5890	29058716	FALSE	FALSE	TRUE	gwas
675	29058716	FALSE	TRUE	TRUE	gwas
4194	29058716	FALSE	FALSE	TRUE	gwas
7015	29058716	FALSE	FALSE	TRUE	gwas
8648	29058716	FALSE	FALSE	TRUE	gwas
84456	29058716	FALSE	FALSE	TRUE	gwas
5195	29058716	FALSE	FALSE	TRUE	gwas
23160	29058716	FALSE	FALSE	TRUE	gwas
143888	29058716	FALSE	FALSE	TRUE	gwas
2099	29058716	TRUE	FALSE	TRUE	gwas
115	29058716	FALSE	FALSE	TRUE	gwas
6934	29058716	FALSE	FALSE	TRUE	gwas
1879	29058716	FALSE	FALSE	TRUE	gwas
59352	29058716	FALSE	FALSE	TRUE	gwas
57591	29058716	FALSE	FALSE	TRUE	gwas
79068	29058716	FALSE	FALSE	TRUE	gwas
26526	29058716	FALSE	FALSE	TRUE	gwas
51460	29124443	FALSE	FALSE	TRUE	gwas
1800	29124443	FALSE	FALSE	TRUE	gwas
55561	29124443	TRUE	FALSE	TRUE	gwas
134285	29124443	FALSE	FALSE	TRUE	gwas
57619	29124443	FALSE	FALSE	TRUE	gwas
3480	29124443	FALSE	FALSE	TRUE	gwas
56606	29124443	FALSE	FALSE	TRUE	gwas
26018	29124443	FALSE	FALSE	TRUE	gwas
4772	29124443	FALSE	FALSE	TRUE	gwas
3626	29124443	FALSE	FALSE	TRUE	gwas
11054	29124443	FALSE	FALSE	TRUE	gwas
7476	29124443	FALSE	FALSE	TRUE	gwas
4790	29124443	FALSE	FALSE	TRUE	gwas
23094	29124443	FALSE	FALSE	TRUE	gwas
4026	29124443	FALSE	FALSE	TRUE	gwas
283450	29124443	FALSE	FALSE	TRUE	gwas
4036	29124443	FALSE	FALSE	TRUE	gwas
9031	29124443	FALSE	FALSE	TRUE	gwas
3784	29124443	FALSE	FALSE	TRUE	gwas
7369	29124443	FALSE	FALSE	TRUE	gwas
2119	29124443	FALSE	FALSE	TRUE	gwas
80724	29124443	FALSE	FALSE	TRUE	gwas
9429	29124443	FALSE	FALSE	TRUE	gwas
2646	29124443	FALSE	FALSE	TRUE	gwas
115286	29124443	FALSE	FALSE	TRUE	gwas
217	29124443	FALSE	FALSE	TRUE	gwas
8537	29124443	FALSE	FALSE	TRUE	gwas
2778	29124443	FALSE	FALSE	TRUE	gwas
6239	29124443	FALSE	FALSE	TRUE	gwas
10725	29124443	FALSE	FALSE	TRUE	gwas
116085	29124443	FALSE	FALSE	TRUE	gwas
8315	29124443	FALSE	FALSE	TRUE	gwas
256764	29124443	FALSE	FALSE	TRUE	gwas
7422	29124443	FALSE	FALSE	TRUE	gwas
64072	29130521	FALSE	FALSE	TRUE	gwas
55671	29130521	TRUE	FALSE	TRUE	gwas
1576	29160300	TRUE	FALSE	TRUE	gwas
285220	29208002	TRUE	FALSE	TRUE	gwas
2731	29210060	TRUE	FALSE	TRUE	gwas
4524	29237677	FALSE	FALSE	TRUE	gwas
4879	29237677	TRUE	FALSE	TRUE	gwas
284498	29237677	FALSE	FALSE	TRUE	gwas
282809	29237677	FALSE	FALSE	TRUE	gwas
23516	29237677	FALSE	FALSE	TRUE	gwas
3992	29246731	FALSE	FALSE	TRUE	gwas
9415	29246731	TRUE	FALSE	TRUE	gwas
9639	29246731	TRUE	FALSE	TRUE	gwas
116519	29263402	TRUE	TRUE	TRUE	gwas
80339	29271184	TRUE	TRUE	TRUE	gwas
25813	29271184	TRUE	FALSE	TRUE	gwas
57705	29331962	TRUE	FALSE	TRUE	gwas
217	29408531	TRUE	TRUE	TRUE	gwas
56606	29408531	FALSE	FALSE	TRUE	gwas
169792	29436472	TRUE	FALSE	TRUE	gwas
2066	29453196	TRUE	FALSE	TRUE	gwas
1600	29472232	FALSE	FALSE	TRUE	gwas
221981	29472232	TRUE	FALSE	TRUE	gwas
9415	29514873	FALSE	FALSE	TRUE	gwas
51761	29514873	FALSE	FALSE	TRUE	gwas
94097	29514873	FALSE	FALSE	TRUE	gwas
92017	29514873	FALSE	FALSE	TRUE	gwas
3992	29514873	TRUE	TRUE	TRUE	gwas
81624	29514873	FALSE	FALSE	TRUE	gwas
219578	29514873	FALSE	FALSE	TRUE	gwas
83548	29514873	FALSE	FALSE	TRUE	gwas
3158	29523524	TRUE	FALSE	TRUE	gwas
10318	29566793	FALSE	FALSE	TRUE	gwas
23025	29566793	FALSE	TRUE	TRUE	gwas
755	29566793	FALSE	FALSE	TRUE	gwas
29110	29566793	FALSE	FALSE	TRUE	gwas
3798	29566793	TRUE	TRUE	TRUE	gwas
203228	29566793	FALSE	FALSE	TRUE	gwas
54901	29674289	TRUE	FALSE	TRUE	gwas
1071	29728394	TRUE	TRUE	TRUE	gwas
255738	29748315	TRUE	TRUE	TRUE	gwas
80028	29748315	FALSE	FALSE	TRUE	gwas
7477	29847655	TRUE	TRUE	TRUE	gwas
55270	29923122	TRUE	TRUE	TRUE	gwas
286046	29967481	TRUE	TRUE	TRUE	gwas
144423	29967481	TRUE	FALSE	TRUE	gwas
5979	30031151	TRUE	FALSE	TRUE	gwas
81559	30066433	TRUE	FALSE	TRUE	gwas
840	30070759	FALSE	FALSE	TRUE	gwas
3026	30070759	TRUE	TRUE	TRUE	gwas
57628	30199657	TRUE	FALSE	TRUE	gwas
27177	30206230	FALSE	FALSE	TRUE	gwas
27178	30206230	TRUE	TRUE	TRUE	gwas
56300	30206230	FALSE	FALSE	TRUE	gwas
3553	30206230	TRUE	TRUE	TRUE	gwas
5915	30251476	TRUE	FALSE	TRUE	gwas
84766	30284742	TRUE	FALSE	TRUE	gwas
2893	30287806	TRUE	TRUE	TRUE	gwas
7173	30367059	FALSE	FALSE	TRUE	gwas
9611	30367059	FALSE	FALSE	TRUE	gwas
10644	30367059	FALSE	FALSE	TRUE	gwas
56981	30367059	FALSE	FALSE	TRUE	gwas
23705	30367059	FALSE	FALSE	TRUE	gwas
6311	30367059	FALSE	FALSE	TRUE	gwas
4905	30367059	FALSE	FALSE	TRUE	gwas
54828	30367059	FALSE	FALSE	TRUE	gwas
169792	30367059	FALSE	FALSE	TRUE	gwas
7104	30367059	FALSE	FALSE	TRUE	gwas
10050	30367059	TRUE	FALSE	TRUE	gwas
1734	30367059	FALSE	FALSE	TRUE	gwas
10451	30367059	FALSE	FALSE	TRUE	gwas
196951	30367059	FALSE	FALSE	TRUE	gwas
130013	30367059	FALSE	FALSE	TRUE	gwas
10599	30367059	FALSE	FALSE	TRUE	gwas
9960	30367059	FALSE	FALSE	TRUE	gwas
137835	30367059	FALSE	FALSE	TRUE	gwas
5613	30367059	FALSE	FALSE	TRUE	gwas
752	30367059	FALSE	FALSE	TRUE	gwas
115	30367059	FALSE	FALSE	TRUE	gwas
440574	30367059	FALSE	FALSE	TRUE	gwas
79068	30566433	TRUE	FALSE	TRUE	gwas
10207	30582445	TRUE	FALSE	TRUE	gwas
55238	30648747	TRUE	FALSE	TRUE	gwas
57480	30659137	TRUE	FALSE	TRUE	gwas
2202	30659137	FALSE	FALSE	TRUE	gwas
91107	30659137	FALSE	FALSE	TRUE	gwas
64241	30692554	TRUE	FALSE	TRUE	gwas
23187	30714141	FALSE	FALSE	TRUE	gwas
23012	30714141	TRUE	FALSE	TRUE	gwas
51750	30714141	FALSE	FALSE	TRUE	gwas
7015	30714141	FALSE	FALSE	TRUE	gwas
8000	30753327	TRUE	TRUE	TRUE	gwas
8629	30753327	FALSE	FALSE	TRUE	gwas
10018	30894546	FALSE	FALSE	TRUE	gwas
2626	30894546	FALSE	FALSE	TRUE	gwas
170691	30894546	FALSE	FALSE	TRUE	gwas
151011	30894546	FALSE	FALSE	TRUE	gwas
80326	30894546	FALSE	FALSE	TRUE	gwas
22856	30894546	FALSE	FALSE	TRUE	gwas
64778	30894546	FALSE	FALSE	TRUE	gwas
1291	30894546	FALSE	FALSE	TRUE	gwas
129804	30894546	FALSE	FALSE	TRUE	gwas
6925	30894546	FALSE	FALSE	TRUE	gwas
64682	30894546	TRUE	FALSE	TRUE	gwas
83660	30894546	FALSE	FALSE	TRUE	gwas
688	30894546	FALSE	FALSE	TRUE	gwas
344558	30894546	FALSE	FALSE	TRUE	gwas
10096	30894546	FALSE	FALSE	TRUE	gwas
3987	30894546	FALSE	FALSE	TRUE	gwas
10461	30894546	FALSE	FALSE	TRUE	gwas
84159	30894546	FALSE	FALSE	TRUE	gwas
6480	30929638	TRUE	FALSE	TRUE	gwas
51752	30946743	FALSE	FALSE	TRUE	gwas
4210	30946743	TRUE	FALSE	TRUE	gwas
9101	30946743	FALSE	FALSE	TRUE	gwas
5630	30992453	TRUE	FALSE	TRUE	gwas
81037	31009812	TRUE	FALSE	TRUE	gwas
4137	31059154	TRUE	FALSE	TRUE	gwas
348	31065058	TRUE	FALSE	TRUE	gwas
55870	31065058	FALSE	FALSE	TRUE	gwas
55666	31073882	TRUE	FALSE	TRUE	gwas
10144	31178129	FALSE	FALSE	TRUE	gwas
196385	31178129	FALSE	FALSE	TRUE	gwas
5184	31178129	FALSE	FALSE	TRUE	gwas
6249	31178129	FALSE	FALSE	TRUE	gwas
23161	31178129	FALSE	FALSE	TRUE	gwas
80790	31178129	FALSE	FALSE	TRUE	gwas
146167	31178129	FALSE	FALSE	TRUE	gwas
168537	31178129	FALSE	FALSE	TRUE	gwas
9370	31178129	TRUE	FALSE	TRUE	gwas
23166	31178129	FALSE	FALSE	TRUE	gwas
3115	31243853	TRUE	FALSE	TRUE	gwas
101180976	31260374	TRUE	FALSE	TRUE	gwas
84898	31271701	TRUE	FALSE	TRUE	gwas
54715	31301374	TRUE	FALSE	TRUE	gwas
3786	31324766	FALSE	FALSE	TRUE	gwas
84083	31324766	TRUE	FALSE	TRUE	gwas
6934	31324766	FALSE	FALSE	TRUE	gwas
7054	31324766	FALSE	FALSE	TRUE	gwas
863	31370031	TRUE	FALSE	TRUE	gwas
596	31465739	TRUE	FALSE	TRUE	gwas
8200	31482140	TRUE	FALSE	TRUE	gwas
9378	31530798	TRUE	FALSE	TRUE	gwas
79884	31530798	FALSE	FALSE	TRUE	gwas
83893	31530798	FALSE	FALSE	TRUE	gwas
164684	31530798	FALSE	FALSE	TRUE	gwas
3752	31600170	TRUE	FALSE	TRUE	gwas
283514	31711042	TRUE	FALSE	TRUE	gwas
1131	31740666	TRUE	FALSE	TRUE	gwas
11264	31761296	FALSE	FALSE	TRUE	gwas
1027	31761296	FALSE	FALSE	TRUE	gwas
54790	31761296	FALSE	FALSE	TRUE	gwas
8200	31761296	FALSE	FALSE	TRUE	gwas
23054	31761296	FALSE	FALSE	TRUE	gwas
79890	31761296	FALSE	FALSE	TRUE	gwas
5139	31761296	FALSE	FALSE	TRUE	gwas
6676	31761296	FALSE	FALSE	TRUE	gwas
253461	31761296	FALSE	FALSE	TRUE	gwas
1558	31761296	FALSE	FALSE	TRUE	gwas
1559	31761296	FALSE	FALSE	TRUE	gwas
54808	31761296	FALSE	FALSE	TRUE	gwas
23576	31761296	FALSE	FALSE	TRUE	gwas
26	31761296	FALSE	FALSE	TRUE	gwas
1562	31761296	FALSE	FALSE	TRUE	gwas
79901	31761296	FALSE	FALSE	TRUE	gwas
51230	31761296	FALSE	FALSE	TRUE	gwas
8738	31761296	FALSE	FALSE	TRUE	gwas
8741	31761296	FALSE	FALSE	TRUE	gwas
51750	31761296	FALSE	FALSE	TRUE	gwas
9258	31761296	FALSE	FALSE	TRUE	gwas
4140	31761296	FALSE	FALSE	TRUE	gwas
152110	31761296	FALSE	FALSE	TRUE	gwas
5168	31761296	FALSE	FALSE	TRUE	gwas
55857	31761296	FALSE	FALSE	TRUE	gwas
3123	31761296	FALSE	FALSE	TRUE	gwas
9784	31761296	FALSE	FALSE	TRUE	gwas
4665	31761296	FALSE	FALSE	TRUE	gwas
7227	31761296	FALSE	FALSE	TRUE	gwas
55870	31761296	FALSE	FALSE	TRUE	gwas
5184	31761296	FALSE	FALSE	TRUE	gwas
10817	31761296	FALSE	FALSE	TRUE	gwas
23112	31761296	FALSE	FALSE	TRUE	gwas
8777	31761296	FALSE	FALSE	TRUE	gwas
54856	31761296	FALSE	FALSE	TRUE	gwas
221264	31761296	FALSE	FALSE	TRUE	gwas
594	31761296	FALSE	FALSE	TRUE	gwas
2646	31761296	FALSE	FALSE	TRUE	gwas
100529239	31761296	FALSE	FALSE	TRUE	gwas
127579	31761296	FALSE	FALSE	TRUE	gwas
64093	31761296	FALSE	FALSE	TRUE	gwas
55902	31761296	FALSE	FALSE	TRUE	gwas
5727	31761296	FALSE	FALSE	TRUE	gwas
140894	31761296	FALSE	FALSE	TRUE	gwas
157285	31761296	FALSE	FALSE	TRUE	gwas
57446	31761296	FALSE	FALSE	TRUE	gwas
4091	31761296	FALSE	FALSE	TRUE	gwas
79980	31761296	FALSE	FALSE	TRUE	gwas
109	31761296	FALSE	FALSE	TRUE	gwas
3693	31761296	FALSE	FALSE	TRUE	gwas
56941	31761296	FALSE	FALSE	TRUE	gwas
6256	31761296	FALSE	FALSE	TRUE	gwas
3697	31761296	FALSE	FALSE	TRUE	gwas
54897	31761296	FALSE	FALSE	TRUE	gwas
56952	31761296	FALSE	FALSE	TRUE	gwas
114818	31761296	FALSE	FALSE	TRUE	gwas
728194	31761296	FALSE	FALSE	TRUE	gwas
2693	31761296	FALSE	FALSE	TRUE	gwas
54407	31761296	FALSE	FALSE	TRUE	gwas
7818	31761296	FALSE	FALSE	TRUE	gwas
10893	31761296	FALSE	FALSE	TRUE	gwas
10903	31761296	FALSE	FALSE	TRUE	gwas
23704	31761296	FALSE	FALSE	TRUE	gwas
2201	31761296	FALSE	FALSE	TRUE	gwas
153241	31761296	FALSE	FALSE	TRUE	gwas
5784	31761296	FALSE	FALSE	TRUE	gwas
2199	31761296	FALSE	FALSE	TRUE	gwas
10393	31761296	FALSE	FALSE	TRUE	gwas
55969	31761296	FALSE	FALSE	TRUE	gwas
126626	31761296	FALSE	FALSE	TRUE	gwas
678	31761296	FALSE	FALSE	TRUE	gwas
4775	31761296	FALSE	FALSE	TRUE	gwas
9896	31761296	FALSE	FALSE	TRUE	gwas
23211	31761296	FALSE	FALSE	TRUE	gwas
2222	31761296	FALSE	FALSE	TRUE	gwas
92335	31761296	FALSE	FALSE	TRUE	gwas
176	31761296	FALSE	FALSE	TRUE	gwas
7343	31761296	FALSE	FALSE	TRUE	gwas
54454	31761296	FALSE	FALSE	TRUE	gwas
84159	31761296	FALSE	FALSE	TRUE	gwas
23232	31761296	FALSE	FALSE	TRUE	gwas
5313	31761296	FALSE	FALSE	TRUE	gwas
57538	31761296	FALSE	FALSE	TRUE	gwas
170691	31761296	FALSE	FALSE	TRUE	gwas
3269	31761296	FALSE	FALSE	TRUE	gwas
64710	31761296	FALSE	FALSE	TRUE	gwas
1734	31761296	FALSE	FALSE	TRUE	gwas
5829	31761296	FALSE	FALSE	TRUE	gwas
25802	31761296	FALSE	FALSE	TRUE	gwas
25803	31761296	FALSE	FALSE	TRUE	gwas
5324	31761296	FALSE	FALSE	TRUE	gwas
23245	31761296	FALSE	FALSE	TRUE	gwas
1743	31761296	FALSE	FALSE	TRUE	gwas
23248	31761296	FALSE	FALSE	TRUE	gwas
9941	31761296	FALSE	FALSE	TRUE	gwas
9942	31761296	FALSE	FALSE	TRUE	gwas
79068	31761296	FALSE	FALSE	TRUE	gwas
64223	31761296	FALSE	FALSE	TRUE	gwas
54496	31761296	FALSE	FALSE	TRUE	gwas
23264	31761296	FALSE	FALSE	TRUE	gwas
65250	31761296	FALSE	FALSE	TRUE	gwas
226	31761296	FALSE	FALSE	TRUE	gwas
101410538	31761296	FALSE	FALSE	TRUE	gwas
25836	31761296	FALSE	FALSE	TRUE	gwas
55027	31761296	FALSE	FALSE	TRUE	gwas
283383	31761296	FALSE	FALSE	TRUE	gwas
116988	31761296	FALSE	FALSE	TRUE	gwas
57597	31761296	FALSE	FALSE	TRUE	gwas
1278	31761296	FALSE	FALSE	TRUE	gwas
80128	31761296	FALSE	FALSE	TRUE	gwas
8448	31761296	FALSE	FALSE	TRUE	gwas
1280	31761296	FALSE	FALSE	TRUE	gwas
1795	31761296	FALSE	FALSE	TRUE	gwas
60676	31761296	FALSE	FALSE	TRUE	gwas
6405	31761296	FALSE	FALSE	TRUE	gwas
221960	31761296	FALSE	FALSE	TRUE	gwas
64778	31761296	FALSE	FALSE	TRUE	gwas
83723	31761296	FALSE	FALSE	TRUE	gwas
6414	31761296	FALSE	FALSE	TRUE	gwas
272	31761296	FALSE	FALSE	TRUE	gwas
8464	31761296	FALSE	FALSE	TRUE	gwas
1296	31761296	FALSE	FALSE	TRUE	gwas
23317	31761296	FALSE	FALSE	TRUE	gwas
57621	31761296	FALSE	FALSE	TRUE	gwas
6430	31761296	FALSE	FALSE	TRUE	gwas
196385	31761296	FALSE	FALSE	TRUE	gwas
28965	31761296	FALSE	FALSE	TRUE	gwas
254251	31761296	FALSE	FALSE	TRUE	gwas
389421	31761296	FALSE	FALSE	TRUE	gwas
80174	31761296	FALSE	FALSE	TRUE	gwas
5934	31761296	FALSE	FALSE	TRUE	gwas
10544	31761296	FALSE	FALSE	TRUE	gwas
22837	31761296	FALSE	FALSE	TRUE	gwas
387893	31761296	FALSE	FALSE	TRUE	gwas
22839	31761296	FALSE	FALSE	TRUE	gwas
6457	31761296	FALSE	FALSE	TRUE	gwas
55100	31761296	FALSE	FALSE	TRUE	gwas
169792	31761296	FALSE	FALSE	TRUE	gwas
317761	31761296	FALSE	FALSE	TRUE	gwas
146754	31761296	FALSE	FALSE	TRUE	gwas
388931	31761296	FALSE	FALSE	TRUE	gwas
100527943	31761296	FALSE	FALSE	TRUE	gwas
221002	31761296	FALSE	FALSE	TRUE	gwas
55114	31761296	FALSE	FALSE	TRUE	gwas
283471	31761296	FALSE	FALSE	TRUE	gwas
131408	31761296	FALSE	FALSE	TRUE	gwas
80212	31761296	FALSE	FALSE	TRUE	gwas
653140	31761296	FALSE	FALSE	TRUE	gwas
11096	31761296	FALSE	FALSE	TRUE	gwas
80219	31761296	FALSE	FALSE	TRUE	gwas
7003	31761296	FALSE	FALSE	TRUE	gwas
5468	31761296	FALSE	FALSE	TRUE	gwas
1373	31761296	FALSE	FALSE	TRUE	gwas
286046	31761296	FALSE	FALSE	TRUE	gwas
860	31761296	FALSE	FALSE	TRUE	gwas
80736	31761296	FALSE	FALSE	TRUE	gwas
3425	31761296	FALSE	FALSE	TRUE	gwas
100527963	31761296	FALSE	FALSE	TRUE	gwas
51043	31761296	FALSE	FALSE	TRUE	gwas
57188	31761296	FALSE	FALSE	TRUE	gwas
128869	31761296	FALSE	FALSE	TRUE	gwas
80737	31761296	FALSE	FALSE	TRUE	gwas
8555	31761296	FALSE	FALSE	TRUE	gwas
79727	31761296	FALSE	FALSE	TRUE	gwas
9584	31761296	FALSE	FALSE	TRUE	gwas
10099	31761296	FALSE	FALSE	TRUE	gwas
1910	31761296	FALSE	FALSE	TRUE	gwas
6521	31761296	FALSE	FALSE	TRUE	gwas
2937	31761296	FALSE	FALSE	TRUE	gwas
285051	31761296	FALSE	FALSE	TRUE	gwas
894	31761296	FALSE	FALSE	TRUE	gwas
4990	31761296	FALSE	FALSE	TRUE	gwas
896	31761296	FALSE	FALSE	TRUE	gwas
57217	31761296	FALSE	FALSE	TRUE	gwas
113026	31761296	FALSE	FALSE	TRUE	gwas
22913	31761296	FALSE	FALSE	TRUE	gwas
51085	31761296	FALSE	FALSE	TRUE	gwas
168850	31761296	FALSE	FALSE	TRUE	gwas
63892	31761296	FALSE	FALSE	TRUE	gwas
80790	31761296	FALSE	FALSE	TRUE	gwas
3480	31761296	FALSE	FALSE	TRUE	gwas
55193	31761296	FALSE	FALSE	TRUE	gwas
64410	31761296	FALSE	FALSE	TRUE	gwas
8091	31761296	FALSE	FALSE	TRUE	gwas
11165	31761296	FALSE	FALSE	TRUE	gwas
6558	31761296	FALSE	FALSE	TRUE	gwas
3486	31761296	FALSE	FALSE	TRUE	gwas
4000	31761296	FALSE	FALSE	TRUE	gwas
83873	31761296	FALSE	FALSE	TRUE	gwas
9633	31761296	FALSE	FALSE	TRUE	gwas
6560	31761296	FALSE	FALSE	TRUE	gwas
11174	31761296	FALSE	FALSE	TRUE	gwas
8614	31761296	TRUE	FALSE	TRUE	gwas
407977	31761296	FALSE	FALSE	TRUE	gwas
4010	31761296	FALSE	FALSE	TRUE	gwas
2475	31761296	FALSE	FALSE	TRUE	gwas
4016	31761296	FALSE	FALSE	TRUE	gwas
9139	31761296	FALSE	FALSE	TRUE	gwas
1462	31761296	FALSE	FALSE	TRUE	gwas
81846	31761296	FALSE	FALSE	TRUE	gwas
80312	31761296	FALSE	FALSE	TRUE	gwas
94137	31761296	FALSE	FALSE	TRUE	gwas
50618	31761296	FALSE	FALSE	TRUE	gwas
54715	31761296	FALSE	FALSE	TRUE	gwas
5053	31761296	FALSE	FALSE	TRUE	gwas
26053	31761296	FALSE	FALSE	TRUE	gwas
9671	31761296	FALSE	FALSE	TRUE	gwas
4041	31761296	FALSE	FALSE	TRUE	gwas
23499	31761296	FALSE	FALSE	TRUE	gwas
165324	31761296	FALSE	FALSE	TRUE	gwas
55245	31761296	FALSE	FALSE	TRUE	gwas
11214	31761296	FALSE	FALSE	TRUE	gwas
5069	31761296	FALSE	FALSE	TRUE	gwas
90459	31761296	FALSE	FALSE	TRUE	gwas
10198	31761296	FALSE	FALSE	TRUE	gwas
353238	31761296	FALSE	FALSE	TRUE	gwas
26074	31761296	FALSE	FALSE	TRUE	gwas
50651	31761296	FALSE	FALSE	TRUE	gwas
144348	31761296	FALSE	FALSE	TRUE	gwas
140766	31761296	FALSE	FALSE	TRUE	gwas
83938	31761296	FALSE	FALSE	TRUE	gwas
84450	31761296	FALSE	FALSE	TRUE	gwas
203238	31761296	FALSE	FALSE	TRUE	gwas
84456	31761296	FALSE	FALSE	TRUE	gwas
5609	31761296	FALSE	FALSE	TRUE	gwas
27113	31761296	FALSE	FALSE	TRUE	gwas
11243	31761296	FALSE	FALSE	TRUE	gwas
7148	31761296	FALSE	FALSE	TRUE	gwas
2036	31761296	FALSE	FALSE	TRUE	gwas
7157	31761296	FALSE	FALSE	TRUE	gwas
4088	31761296	FALSE	FALSE	TRUE	gwas
57337	31761296	FALSE	FALSE	TRUE	gwas
55291	31761296	FALSE	FALSE	TRUE	gwas
51196	31761296	FALSE	FALSE	TRUE	gwas
1021	31761296	FALSE	FALSE	TRUE	gwas
3070	31761296	FALSE	FALSE	TRUE	gwas
84059	31792237	TRUE	FALSE	TRUE	gwas
3995	31862735	TRUE	FALSE	TRUE	gwas
6595	32019955	TRUE	FALSE	TRUE	gwas
26574	32019955	TRUE	FALSE	TRUE	gwas
249	32141789	TRUE	FALSE	TRUE	gwas
4018	32141789	FALSE	FALSE	TRUE	gwas
3569	32141789	TRUE	FALSE	TRUE	gwas
27241	32266521	FALSE	FALSE	TRUE	gwas
655	32266521	TRUE	FALSE	TRUE	gwas
577	32363570	FALSE	FALSE	TRUE	gwas
55867	32363570	TRUE	FALSE	TRUE	gwas
5738	32460577	FALSE	FALSE	TRUE	gwas
26762	32460577	TRUE	FALSE	TRUE	gwas
6444	32460577	FALSE	FALSE	TRUE	gwas
10351	32460577	FALSE	FALSE	TRUE	gwas
3702	32460577	FALSE	FALSE	TRUE	gwas
26999	32460577	FALSE	FALSE	TRUE	gwas
8728	32460577	FALSE	FALSE	TRUE	gwas
2200	32499652	TRUE	FALSE	TRUE	gwas
7297	32581359	FALSE	FALSE	TRUE	gwas
5890	32581359	FALSE	FALSE	TRUE	gwas
3716	32581359	FALSE	FALSE	TRUE	gwas
7173	32581359	FALSE	FALSE	TRUE	gwas
64135	32581359	FALSE	FALSE	TRUE	gwas
8840	32581359	FALSE	FALSE	TRUE	gwas
87178	32581359	FALSE	FALSE	TRUE	gwas
10125	32581359	FALSE	FALSE	TRUE	gwas
219790	32581359	FALSE	FALSE	TRUE	gwas
9744	32581359	FALSE	FALSE	TRUE	gwas
2065	32581359	FALSE	FALSE	TRUE	gwas
2322	32581359	TRUE	FALSE	TRUE	gwas
919	32581359	FALSE	FALSE	TRUE	gwas
10019	32581359	FALSE	FALSE	TRUE	gwas
50852	32581359	FALSE	FALSE	TRUE	gwas
6311	32581359	FALSE	FALSE	TRUE	gwas
10666	32581359	FALSE	FALSE	TRUE	gwas
3117	32581359	FALSE	FALSE	TRUE	gwas
942	32581359	FALSE	FALSE	TRUE	gwas
814	32581359	FALSE	FALSE	TRUE	gwas
3633	32581359	FALSE	FALSE	TRUE	gwas
128178	32581359	FALSE	FALSE	TRUE	gwas
60468	32581359	FALSE	FALSE	TRUE	gwas
30009	32581359	FALSE	FALSE	TRUE	gwas
4026	32581359	FALSE	FALSE	TRUE	gwas
8635	32581359	FALSE	FALSE	TRUE	gwas
8764	32581359	FALSE	FALSE	TRUE	gwas
7098	32581359	FALSE	FALSE	TRUE	gwas
84159	32581359	FALSE	FALSE	TRUE	gwas
29121	32581359	FALSE	FALSE	TRUE	gwas
260425	32581359	FALSE	FALSE	TRUE	gwas
59338	32581359	FALSE	FALSE	TRUE	gwas
3661	32581359	FALSE	FALSE	TRUE	gwas
3662	32581359	FALSE	FALSE	TRUE	gwas
26191	32581359	FALSE	FALSE	TRUE	gwas
24145	32581359	FALSE	FALSE	TRUE	gwas
10451	32581359	FALSE	FALSE	TRUE	gwas
1493	32581359	FALSE	FALSE	TRUE	gwas
10581	32581359	FALSE	FALSE	TRUE	gwas
64599	32581359	FALSE	FALSE	TRUE	gwas
114904	32581359	FALSE	FALSE	TRUE	gwas
473	32581359	FALSE	FALSE	TRUE	gwas
9047	32581359	FALSE	FALSE	TRUE	gwas
51300	32581359	FALSE	FALSE	TRUE	gwas
2534	32581359	FALSE	FALSE	TRUE	gwas
5862	32581359	FALSE	FALSE	TRUE	gwas
6760	32581359	FALSE	FALSE	TRUE	gwas
6506	32581359	FALSE	FALSE	TRUE	gwas
23533	32581359	FALSE	FALSE	TRUE	gwas
1776	32581359	FALSE	FALSE	TRUE	gwas
113	32581359	FALSE	FALSE	TRUE	gwas
9844	32581359	FALSE	FALSE	TRUE	gwas
1524	32581359	FALSE	FALSE	TRUE	gwas
5878	32581359	FALSE	FALSE	TRUE	gwas
6775	32581359	FALSE	FALSE	TRUE	gwas
7038	32581359	FALSE	FALSE	TRUE	gwas
729852	32737115	TRUE	FALSE	TRUE	gwas
6119	32737115	TRUE	FALSE	TRUE	gwas
80129	33097703	FALSE	FALSE	TRUE	gwas
84870	33097703	FALSE	FALSE	TRUE	gwas
2099	33097703	FALSE	FALSE	TRUE	gwas
56955	33097703	TRUE	FALSE	TRUE	gwas
65084	33097703	FALSE	FALSE	TRUE	gwas
2177	14743216	FALSE	FALSE	TRUE	aff_ms
11140	14743216	FALSE	TRUE	TRUE	aff_ms
8454	14743216	FALSE	FALSE	TRUE	aff_ms
84231	14743216	FALSE	TRUE	TRUE	aff_ms
9099	14743216	FALSE	FALSE	TRUE	aff_ms
6156	14743216	FALSE	FALSE	TRUE	aff_ms
55054	14743216	FALSE	FALSE	TRUE	aff_ms
7186	14743216	FALSE	TRUE	TRUE	aff_ms
7187	14743216	FALSE	TRUE	TRUE	aff_ms
1431	14743216	FALSE	FALSE	TRUE	aff_ms
10010	14743216	FALSE	FALSE	TRUE	aff_ms
9755	14743216	FALSE	TRUE	TRUE	aff_ms
10013	14743216	FALSE	FALSE	TRUE	aff_ms
5537	14743216	FALSE	TRUE	TRUE	aff_ms
10914	14743216	FALSE	FALSE	TRUE	aff_ms
81572	14743216	FALSE	FALSE	TRUE	aff_ms
10788	14743216	FALSE	TRUE	TRUE	aff_ms
8237	14743216	FALSE	TRUE	TRUE	aff_ms
2734	14743216	FALSE	FALSE	TRUE	aff_ms
1326	14743216	FALSE	TRUE	TRUE	aff_ms
79155	14743216	FALSE	TRUE	TRUE	aff_ms
4790	14743216	TRUE	TRUE	TRUE	aff_ms
4791	14743216	FALSE	FALSE	TRUE	aff_ms
10238	14743216	FALSE	TRUE	TRUE	aff_ms
29110	14743216	FALSE	TRUE	TRUE	aff_ms
3895	14743216	FALSE	FALSE	TRUE	aff_ms
79931	14743216	FALSE	FALSE	TRUE	aff_ms
9276	14743216	FALSE	FALSE	TRUE	aff_ms
5693	14743216	FALSE	FALSE	TRUE	aff_ms
6207	14743216	FALSE	FALSE	TRUE	aff_ms
9919	14743216	FALSE	TRUE	TRUE	aff_ms
5700	14743216	FALSE	FALSE	TRUE	aff_ms
5701	14743216	FALSE	FALSE	TRUE	aff_ms
6597	14743216	FALSE	FALSE	TRUE	aff_ms
6599	14743216	FALSE	FALSE	TRUE	aff_ms
6598	14743216	FALSE	TRUE	TRUE	aff_ms
6601	14743216	FALSE	FALSE	TRUE	aff_ms
5702	14743216	FALSE	FALSE	TRUE	aff_ms
23243	14743216	FALSE	TRUE	TRUE	aff_ms
5707	14743216	FALSE	FALSE	TRUE	aff_ms
6605	14743216	FALSE	FALSE	TRUE	aff_ms
5966	14743216	FALSE	FALSE	TRUE	aff_ms
5709	14743216	FALSE	FALSE	TRUE	aff_ms
3784	14743216	FALSE	FALSE	TRUE	aff_ms
5713	14743216	FALSE	FALSE	TRUE	aff_ms
5202	14743216	FALSE	FALSE	TRUE	aff_ms
5970	14743216	FALSE	TRUE	TRUE	aff_ms
7124	14743216	TRUE	TRUE	TRUE	aff_ms
9043	14743216	FALSE	FALSE	TRUE	aff_ms
5971	14743216	FALSE	TRUE	TRUE	aff_ms
86	14743216	FALSE	FALSE	TRUE	aff_ms
10454	14743216	FALSE	FALSE	TRUE	aff_ms
22870	14743216	FALSE	FALSE	TRUE	aff_ms
5719	14743216	FALSE	FALSE	TRUE	aff_ms
5718	14743216	FALSE	FALSE	TRUE	aff_ms
2011	14743216	FALSE	FALSE	TRUE	aff_ms
5977	14743216	FALSE	FALSE	TRUE	aff_ms
605	14743216	FALSE	FALSE	TRUE	aff_ms
6500	14743216	FALSE	FALSE	TRUE	aff_ms
8517	14743216	FALSE	TRUE	TRUE	aff_ms
9701	14743216	FALSE	FALSE	TRUE	aff_ms
5607	14743216	FALSE	FALSE	TRUE	aff_ms
7532	14743216	FALSE	FALSE	TRUE	aff_ms
6124	14743216	FALSE	FALSE	TRUE	aff_ms
3308	14743216	FALSE	FALSE	TRUE	aff_ms
3838	14743216	FALSE	TRUE	TRUE	aff_ms
6128	14743216	FALSE	FALSE	TRUE	aff_ms
8945	14743216	FALSE	FALSE	TRUE	aff_ms
2289	14743216	FALSE	TRUE	TRUE	aff_ms
26993	14743216	FALSE	FALSE	TRUE	aff_ms
1654	14743216	FALSE	TRUE	TRUE	aff_ms
23633	14743216	FALSE	FALSE	TRUE	aff_ms
55294	14743216	FALSE	FALSE	TRUE	aff_ms
3839	14743216	FALSE	FALSE	TRUE	aff_ms
10399	16105984	FALSE	FALSE	TRUE	aff_ms
23299	16105984	FALSE	FALSE	TRUE	aff_ms
4646	16105984	FALSE	FALSE	TRUE	aff_ms
7431	16105984	FALSE	FALSE	TRUE	aff_ms
2314	16105984	FALSE	FALSE	TRUE	aff_ms
60	16105984	FALSE	FALSE	TRUE	aff_ms
10383	16105984	FALSE	FALSE	TRUE	aff_ms
81	16105984	FALSE	FALSE	TRUE	aff_ms
4627	16105984	FALSE	FALSE	TRUE	aff_ms
4628	16105984	FALSE	FALSE	TRUE	aff_ms
23603	16105984	FALSE	FALSE	TRUE	aff_ms
9564	16105984	TRUE	TRUE	TRUE	aff_ms
10844	16105984	FALSE	FALSE	TRUE	aff_ms
27295	16105984	FALSE	FALSE	TRUE	aff_ms
2	17110338	FALSE	FALSE	TRUE	aff_ms
11273	17110338	FALSE	FALSE	TRUE	aff_ms
2059	17110338	FALSE	FALSE	TRUE	aff_ms
8723	17110338	FALSE	FALSE	TRUE	aff_ms
55832	17110338	FALSE	FALSE	TRUE	aff_ms
8218	17110338	FALSE	FALSE	TRUE	aff_ms
5660	17110338	FALSE	FALSE	TRUE	aff_ms
85021	17110338	FALSE	FALSE	TRUE	aff_ms
55327	17110338	FALSE	FALSE	TRUE	aff_ms
7203	17110338	FALSE	FALSE	TRUE	aff_ms
10280	17110338	FALSE	FALSE	TRUE	aff_ms
8239	17110338	FALSE	FALSE	TRUE	aff_ms
1072	17110338	FALSE	FALSE	TRUE	aff_ms
10801	17110338	FALSE	FALSE	TRUE	aff_ms
27183	17110338	FALSE	FALSE	TRUE	aff_ms
10294	17110338	FALSE	TRUE	TRUE	aff_ms
1080	17110338	TRUE	TRUE	TRUE	aff_ms
10808	17110338	FALSE	FALSE	TRUE	aff_ms
5689	17110338	FALSE	FALSE	TRUE	aff_ms
5691	17110338	FALSE	FALSE	TRUE	aff_ms
5692	17110338	FALSE	FALSE	TRUE	aff_ms
1601	17110338	FALSE	FALSE	TRUE	aff_ms
5704	17110338	FALSE	FALSE	TRUE	aff_ms
5708	17110338	FALSE	FALSE	TRUE	aff_ms
65108	17110338	FALSE	FALSE	TRUE	aff_ms
5717	17110338	FALSE	FALSE	TRUE	aff_ms
5721	17110338	FALSE	FALSE	TRUE	aff_ms
613	17110338	FALSE	FALSE	TRUE	aff_ms
10342	17110338	FALSE	FALSE	TRUE	aff_ms
9320	17110338	FALSE	FALSE	TRUE	aff_ms
58472	17110338	FALSE	FALSE	TRUE	aff_ms
55914	17110338	FALSE	FALSE	TRUE	aff_ms
114	17110338	FALSE	FALSE	TRUE	aff_ms
6259	17110338	FALSE	FALSE	TRUE	aff_ms
23157	17110338	FALSE	FALSE	TRUE	aff_ms
6262	17110338	FALSE	FALSE	TRUE	aff_ms
6263	17110338	FALSE	FALSE	TRUE	aff_ms
9859	17110338	FALSE	FALSE	TRUE	aff_ms
6278	17110338	FALSE	FALSE	TRUE	aff_ms
9351	17110338	FALSE	FALSE	TRUE	aff_ms
6280	17110338	FALSE	FALSE	TRUE	aff_ms
51337	17110338	FALSE	FALSE	TRUE	aff_ms
2193	17110338	FALSE	FALSE	TRUE	aff_ms
9368	17110338	FALSE	FALSE	TRUE	aff_ms
1179	17110338	FALSE	FALSE	TRUE	aff_ms
23196	17110338	FALSE	FALSE	TRUE	aff_ms
10399	17110338	FALSE	FALSE	TRUE	aff_ms
7337	17110338	FALSE	FALSE	TRUE	aff_ms
6840	17110338	FALSE	FALSE	TRUE	aff_ms
1211	17110338	FALSE	FALSE	TRUE	aff_ms
5310	17110338	FALSE	FALSE	TRUE	aff_ms
2767	17110338	FALSE	FALSE	TRUE	aff_ms
2771	17110338	FALSE	FALSE	TRUE	aff_ms
3799	17110338	FALSE	FALSE	TRUE	aff_ms
10456	17110338	FALSE	FALSE	TRUE	aff_ms
3800	17110338	FALSE	FALSE	TRUE	aff_ms
3301	17110338	FALSE	FALSE	TRUE	aff_ms
51429	17110338	FALSE	FALSE	TRUE	aff_ms
3303	17110338	FALSE	FALSE	TRUE	aff_ms
29927	17110338	FALSE	FALSE	TRUE	aff_ms
3305	17110338	FALSE	FALSE	TRUE	aff_ms
3306	17110338	FALSE	FALSE	TRUE	aff_ms
64232	17110338	FALSE	FALSE	TRUE	aff_ms
3310	17110338	FALSE	FALSE	TRUE	aff_ms
3312	17110338	FALSE	TRUE	TRUE	aff_ms
9968	17110338	FALSE	FALSE	TRUE	aff_ms
3315	17110338	FALSE	TRUE	TRUE	aff_ms
83699	17110338	FALSE	FALSE	TRUE	aff_ms
7415	17110338	FALSE	FALSE	TRUE	aff_ms
3320	17110338	TRUE	TRUE	TRUE	aff_ms
3837	17110338	FALSE	FALSE	TRUE	aff_ms
3326	17110338	FALSE	TRUE	TRUE	aff_ms
9472	17110338	FALSE	FALSE	TRUE	aff_ms
3329	17110338	FALSE	FALSE	TRUE	aff_ms
3843	17110338	FALSE	FALSE	TRUE	aff_ms
6921	17110338	FALSE	FALSE	TRUE	aff_ms
7433	17110338	FALSE	FALSE	TRUE	aff_ms
6923	17110338	FALSE	FALSE	TRUE	aff_ms
5901	17110338	FALSE	FALSE	TRUE	aff_ms
5902	17110338	FALSE	FALSE	TRUE	aff_ms
2319	17110338	FALSE	FALSE	TRUE	aff_ms
84752	17110338	FALSE	FALSE	TRUE	aff_ms
10527	17110338	FALSE	FALSE	TRUE	aff_ms
10016	17110338	FALSE	FALSE	TRUE	aff_ms
1315	17110338	FALSE	FALSE	TRUE	aff_ms
51495	17110338	FALSE	FALSE	TRUE	aff_ms
813	17110338	FALSE	TRUE	TRUE	aff_ms
23344	17110338	FALSE	FALSE	TRUE	aff_ms
9520	17110338	FALSE	FALSE	TRUE	aff_ms
821	17110338	FALSE	FALSE	TRUE	aff_ms
51514	17110338	FALSE	FALSE	TRUE	aff_ms
9532	17110338	FALSE	FALSE	TRUE	aff_ms
10558	17110338	FALSE	FALSE	TRUE	aff_ms
56128	17110338	FALSE	FALSE	TRUE	aff_ms
5954	17110338	FALSE	FALSE	TRUE	aff_ms
5955	17110338	FALSE	FALSE	TRUE	aff_ms
324	17110338	FALSE	FALSE	TRUE	aff_ms
10575	17110338	FALSE	FALSE	TRUE	aff_ms
2896	17110338	FALSE	FALSE	TRUE	aff_ms
79188	17110338	FALSE	FALSE	TRUE	aff_ms
7514	17110338	FALSE	FALSE	TRUE	aff_ms
22874	17110338	FALSE	FALSE	TRUE	aff_ms
56667	17110338	FALSE	FALSE	TRUE	aff_ms
79714	17110338	FALSE	FALSE	TRUE	aff_ms
56675	17110338	FALSE	FALSE	TRUE	aff_ms
10598	17110338	TRUE	TRUE	TRUE	aff_ms
5479	17110338	FALSE	FALSE	TRUE	aff_ms
10613	17110338	FALSE	TRUE	TRUE	aff_ms
3958	17110338	FALSE	FALSE	TRUE	aff_ms
11127	17110338	FALSE	FALSE	TRUE	aff_ms
3960	17110338	FALSE	FALSE	TRUE	aff_ms
11141	17110338	FALSE	FALSE	TRUE	aff_ms
55176	17110338	FALSE	FALSE	TRUE	aff_ms
5515	17110338	FALSE	FALSE	TRUE	aff_ms
5518	17110338	FALSE	FALSE	TRUE	aff_ms
5519	17110338	FALSE	FALSE	TRUE	aff_ms
5520	17110338	FALSE	FALSE	TRUE	aff_ms
5521	17110338	FALSE	FALSE	TRUE	aff_ms
11160	17110338	FALSE	TRUE	TRUE	aff_ms
55705	17110338	FALSE	FALSE	TRUE	aff_ms
1434	17110338	FALSE	FALSE	TRUE	aff_ms
7074	17110338	FALSE	FALSE	TRUE	aff_ms
4008	17110338	FALSE	FALSE	TRUE	aff_ms
5033	17110338	FALSE	FALSE	TRUE	aff_ms
55210	17110338	FALSE	FALSE	TRUE	aff_ms
9131	17110338	FALSE	FALSE	TRUE	aff_ms
63929	17110338	FALSE	FALSE	TRUE	aff_ms
81855	17110338	FALSE	FALSE	TRUE	aff_ms
1476	17110338	FALSE	FALSE	TRUE	aff_ms
966	17110338	FALSE	FALSE	TRUE	aff_ms
55752	17110338	FALSE	FALSE	TRUE	aff_ms
9685	17110338	FALSE	FALSE	TRUE	aff_ms
51669	17110338	FALSE	FALSE	TRUE	aff_ms
5591	17110338	FALSE	FALSE	TRUE	aff_ms
2010	17110338	FALSE	FALSE	TRUE	aff_ms
9694	17110338	FALSE	FALSE	TRUE	aff_ms
999	17110338	FALSE	FALSE	TRUE	aff_ms
10728	17110338	FALSE	FALSE	TRUE	aff_ms
488	17110338	FALSE	FALSE	TRUE	aff_ms
4072	17110338	FALSE	FALSE	TRUE	aff_ms
487	17110338	FALSE	FALSE	TRUE	aff_ms
23534	17110338	FALSE	FALSE	TRUE	aff_ms
9201	17110338	FALSE	FALSE	TRUE	aff_ms
5110	17110338	FALSE	FALSE	TRUE	aff_ms
55288	17110338	FALSE	FALSE	TRUE	aff_ms
9209	17110338	FALSE	FALSE	TRUE	aff_ms
6653	17110338	FALSE	FALSE	TRUE	aff_ms
27134	17110338	FALSE	FALSE	TRUE	aff_ms
10146	17297477	TRUE	TRUE	TRUE	aff_ms
9908	17297477	FALSE	TRUE	TRUE	aff_ms
3842	17342744	FALSE	FALSE	TRUE	aff_ms
54788	17342744	FALSE	FALSE	TRUE	aff_ms
9221	17342744	FALSE	FALSE	TRUE	aff_ms
143879	17342744	FALSE	FALSE	TRUE	aff_ms
8969	17342744	FALSE	FALSE	TRUE	aff_ms
6156	17342744	FALSE	FALSE	TRUE	aff_ms
2319	17342744	FALSE	FALSE	TRUE	aff_ms
400	17342744	FALSE	FALSE	TRUE	aff_ms
9361	17342744	FALSE	FALSE	TRUE	aff_ms
3858	17342744	FALSE	FALSE	TRUE	aff_ms
4627	17342744	FALSE	FALSE	TRUE	aff_ms
83986	17342744	FALSE	FALSE	TRUE	aff_ms
80279	17342744	FALSE	FALSE	TRUE	aff_ms
5912	17342744	FALSE	FALSE	TRUE	aff_ms
9368	17342744	FALSE	FALSE	TRUE	aff_ms
10269	17342744	FALSE	FALSE	TRUE	aff_ms
8607	17342744	FALSE	FALSE	TRUE	aff_ms
4000	17342744	FALSE	FALSE	TRUE	aff_ms
3615	17342744	FALSE	FALSE	TRUE	aff_ms
113828	17342744	FALSE	FALSE	TRUE	aff_ms
6566	17342744	FALSE	FALSE	TRUE	aff_ms
347688	17342744	FALSE	FALSE	TRUE	aff_ms
4522	17342744	FALSE	FALSE	TRUE	aff_ms
2346	17342744	FALSE	FALSE	TRUE	aff_ms
11052	17342744	FALSE	FALSE	TRUE	aff_ms
64432	17342744	FALSE	FALSE	TRUE	aff_ms
3635	17342744	FALSE	FALSE	TRUE	aff_ms
10548	17342744	FALSE	FALSE	TRUE	aff_ms
65080	17342744	FALSE	FALSE	TRUE	aff_ms
2235	17342744	FALSE	FALSE	TRUE	aff_ms
6204	17342744	FALSE	FALSE	TRUE	aff_ms
729540	17342744	FALSE	FALSE	TRUE	aff_ms
64710	17342744	FALSE	FALSE	TRUE	aff_ms
3656	17342744	FALSE	FALSE	TRUE	aff_ms
10954	17342744	FALSE	FALSE	TRUE	aff_ms
337867	17342744	FALSE	FALSE	TRUE	aff_ms
83787	17342744	FALSE	FALSE	TRUE	aff_ms
51150	17342744	FALSE	FALSE	TRUE	aff_ms
9295	17342744	FALSE	FALSE	TRUE	aff_ms
9551	17342744	FALSE	FALSE	TRUE	aff_ms
6228	17342744	FALSE	FALSE	TRUE	aff_ms
653269	17342744	FALSE	FALSE	TRUE	aff_ms
6748	17342744	FALSE	FALSE	TRUE	aff_ms
55004	17342744	FALSE	FALSE	TRUE	aff_ms
10332	17342744	FALSE	FALSE	TRUE	aff_ms
10335	17342744	FALSE	FALSE	TRUE	aff_ms
7520	17342744	FALSE	FALSE	TRUE	aff_ms
4704	17342744	FALSE	FALSE	TRUE	aff_ms
81889	17342744	FALSE	FALSE	TRUE	aff_ms
224	17342744	FALSE	FALSE	TRUE	aff_ms
4705	17342744	FALSE	FALSE	TRUE	aff_ms
479	17342744	FALSE	FALSE	TRUE	aff_ms
4710	17342744	FALSE	FALSE	TRUE	aff_ms
3303	17342744	FALSE	FALSE	TRUE	aff_ms
10856	17342744	FALSE	FALSE	TRUE	aff_ms
23530	17342744	FALSE	FALSE	TRUE	aff_ms
7402	17342744	FALSE	FALSE	TRUE	aff_ms
92140	17342744	FALSE	FALSE	TRUE	aff_ms
9584	17342744	FALSE	FALSE	TRUE	aff_ms
3312	17342744	FALSE	FALSE	TRUE	aff_ms
4976	17342744	FALSE	FALSE	TRUE	aff_ms
3315	17342744	TRUE	FALSE	TRUE	aff_ms
25840	17342744	FALSE	FALSE	TRUE	aff_ms
2166	17342744	FALSE	FALSE	TRUE	aff_ms
5111	17342744	FALSE	FALSE	TRUE	aff_ms
7417	17342744	FALSE	FALSE	TRUE	aff_ms
1915	17342744	FALSE	FALSE	TRUE	aff_ms
9730	17609381	TRUE	TRUE	TRUE	aff_ms
292	17609381	FALSE	FALSE	TRUE	aff_ms
8453	17609381	FALSE	FALSE	TRUE	aff_ms
8520	17609381	FALSE	FALSE	TRUE	aff_ms
64393	17609381	FALSE	FALSE	TRUE	aff_ms
1642	17609381	TRUE	TRUE	TRUE	aff_ms
26057	17609381	FALSE	FALSE	TRUE	aff_ms
79016	17609381	FALSE	TRUE	TRUE	aff_ms
3837	17609381	FALSE	FALSE	TRUE	aff_ms
79711	17609381	FALSE	FALSE	TRUE	aff_ms
7042	18239623	FALSE	FALSE	TRUE	aff_ms
4355	18239623	FALSE	FALSE	TRUE	aff_ms
171023	18239623	FALSE	FALSE	TRUE	aff_ms
5903	18239623	FALSE	FALSE	TRUE	aff_ms
6421	18239623	FALSE	FALSE	TRUE	aff_ms
1050	18239623	TRUE	TRUE	TRUE	aff_ms
10524	18239623	TRUE	TRUE	TRUE	aff_ms
10142	18239623	FALSE	FALSE	TRUE	aff_ms
83871	18239623	FALSE	FALSE	TRUE	aff_ms
6944	18239623	FALSE	FALSE	TRUE	aff_ms
6434	18239623	FALSE	FALSE	TRUE	aff_ms
5925	18239623	FALSE	FALSE	TRUE	aff_ms
64425	18239623	FALSE	FALSE	TRUE	aff_ms
26289	18239623	FALSE	FALSE	TRUE	aff_ms
8243	18239623	FALSE	FALSE	TRUE	aff_ms
824	18239623	FALSE	FALSE	TRUE	aff_ms
23499	18239623	FALSE	FALSE	TRUE	aff_ms
4174	18239623	FALSE	FALSE	TRUE	aff_ms
2130	18239623	FALSE	FALSE	TRUE	aff_ms
1874	18239623	FALSE	FALSE	TRUE	aff_ms
5586	18239623	FALSE	FALSE	TRUE	aff_ms
51154	18239623	FALSE	FALSE	TRUE	aff_ms
116443	18239623	FALSE	FALSE	TRUE	aff_ms
5223	18239623	FALSE	FALSE	TRUE	aff_ms
3431	18239623	FALSE	FALSE	TRUE	aff_ms
2670	18239623	FALSE	FALSE	TRUE	aff_ms
3183	18239623	FALSE	FALSE	TRUE	aff_ms
4335	18239623	FALSE	TRUE	TRUE	aff_ms
79612	18239623	FALSE	FALSE	TRUE	aff_ms
3716	18271526	FALSE	FALSE	TRUE	aff_ms
9732	18271526	FALSE	FALSE	TRUE	aff_ms
7186	18271526	FALSE	FALSE	TRUE	aff_ms
83732	18271526	FALSE	FALSE	TRUE	aff_ms
1950	18271526	FALSE	TRUE	TRUE	aff_ms
284451	18271526	TRUE	FALSE	TRUE	aff_ms
1956	18271526	TRUE	TRUE	TRUE	aff_ms
9774	18271526	FALSE	FALSE	TRUE	aff_ms
8241	18271526	FALSE	FALSE	TRUE	aff_ms
55601	18271526	FALSE	FALSE	TRUE	aff_ms
26292	18271526	FALSE	FALSE	TRUE	aff_ms
5052	18271526	FALSE	FALSE	TRUE	aff_ms
54206	18271526	FALSE	TRUE	TRUE	aff_ms
6464	18271526	FALSE	FALSE	TRUE	aff_ms
2241	18271526	FALSE	FALSE	TRUE	aff_ms
2885	18271526	FALSE	FALSE	TRUE	aff_ms
10188	18271526	FALSE	FALSE	TRUE	aff_ms
8660	18271526	FALSE	FALSE	TRUE	aff_ms
10454	18271526	FALSE	FALSE	TRUE	aff_ms
983	18271526	FALSE	FALSE	TRUE	aff_ms
84959	18271526	FALSE	FALSE	TRUE	aff_ms
144097	18271526	FALSE	FALSE	TRUE	aff_ms
867	18271526	FALSE	FALSE	TRUE	aff_ms
868	18271526	FALSE	FALSE	TRUE	aff_ms
3308	18271526	FALSE	FALSE	TRUE	aff_ms
3054	18271526	FALSE	FALSE	TRUE	aff_ms
7410	18271526	FALSE	FALSE	TRUE	aff_ms
3187	18271526	FALSE	FALSE	TRUE	aff_ms
2549	18271526	FALSE	FALSE	TRUE	aff_ms
55285	18271526	FALSE	FALSE	TRUE	aff_ms
1399	18271526	FALSE	FALSE	TRUE	aff_ms
6654	18271526	FALSE	FALSE	TRUE	aff_ms
6655	18271526	FALSE	FALSE	TRUE	aff_ms
5250	18729074	FALSE	FALSE	TRUE	aff_ms
9351	18729074	FALSE	FALSE	TRUE	aff_ms
11273	18729074	FALSE	FALSE	TRUE	aff_ms
9610	18729074	FALSE	FALSE	TRUE	aff_ms
908	18729074	FALSE	TRUE	TRUE	aff_ms
5777	18729074	FALSE	FALSE	TRUE	aff_ms
83858	18729074	FALSE	FALSE	TRUE	aff_ms
790	18729074	FALSE	FALSE	TRUE	aff_ms
22938	18729074	FALSE	FALSE	TRUE	aff_ms
8604	18729074	FALSE	FALSE	TRUE	aff_ms
9372	18729074	FALSE	FALSE	TRUE	aff_ms
292	18729074	FALSE	FALSE	TRUE	aff_ms
293	18729074	FALSE	FALSE	TRUE	aff_ms
6950	18729074	FALSE	FALSE	TRUE	aff_ms
23592	18729074	FALSE	FALSE	TRUE	aff_ms
1453	18729074	FALSE	FALSE	TRUE	aff_ms
688	18729074	FALSE	FALSE	TRUE	aff_ms
11060	18729074	FALSE	FALSE	TRUE	aff_ms
23348	18729074	FALSE	FALSE	TRUE	aff_ms
10294	18729074	FALSE	FALSE	TRUE	aff_ms
56897	18729074	FALSE	FALSE	TRUE	aff_ms
7874	18729074	FALSE	FALSE	TRUE	aff_ms
1859	18729074	FALSE	FALSE	TRUE	aff_ms
728642	18729074	FALSE	FALSE	TRUE	aff_ms
57669	18729074	FALSE	FALSE	TRUE	aff_ms
1606	18729074	FALSE	FALSE	TRUE	aff_ms
26056	18729074	FALSE	FALSE	TRUE	aff_ms
11338	18729074	FALSE	FALSE	TRUE	aff_ms
8653	18729074	FALSE	FALSE	TRUE	aff_ms
644815	18729074	FALSE	FALSE	TRUE	aff_ms
57680	18729074	FALSE	FALSE	TRUE	aff_ms
3667	18729074	FALSE	FALSE	TRUE	aff_ms
5594	18729074	FALSE	FALSE	TRUE	aff_ms
23387	18729074	FALSE	FALSE	TRUE	aff_ms
64219	18729074	FALSE	FALSE	TRUE	aff_ms
4089	18729074	FALSE	FALSE	TRUE	aff_ms
9184	18729074	FALSE	FALSE	TRUE	aff_ms
6497	18729074	FALSE	FALSE	TRUE	aff_ms
6498	18729074	FALSE	FALSE	TRUE	aff_ms
4090	18729074	FALSE	FALSE	TRUE	aff_ms
55269	18729074	FALSE	TRUE	TRUE	aff_ms
23143	18729074	FALSE	FALSE	TRUE	aff_ms
7528	18729074	FALSE	FALSE	TRUE	aff_ms
58472	18729074	FALSE	FALSE	TRUE	aff_ms
26986	18729074	FALSE	FALSE	TRUE	aff_ms
6122	18729074	FALSE	FALSE	TRUE	aff_ms
6124	18729074	FALSE	FALSE	TRUE	aff_ms
3308	18729074	FALSE	FALSE	TRUE	aff_ms
55914	18729074	FALSE	FALSE	TRUE	aff_ms
3691	18729074	FALSE	FALSE	TRUE	aff_ms
4976	18729074	FALSE	FALSE	TRUE	aff_ms
51441	18729074	FALSE	FALSE	TRUE	aff_ms
7410	18729074	FALSE	FALSE	TRUE	aff_ms
64750	18729074	FALSE	FALSE	TRUE	aff_ms
54514	18729074	FALSE	FALSE	TRUE	aff_ms
55795	18729074	FALSE	FALSE	TRUE	aff_ms
4086	18729074	FALSE	FALSE	TRUE	aff_ms
4087	18729074	TRUE	TRUE	TRUE	aff_ms
4088	18729074	TRUE	TRUE	TRUE	aff_ms
1654	18729074	FALSE	FALSE	TRUE	aff_ms
79098	18729074	FALSE	FALSE	TRUE	aff_ms
1659	18729074	FALSE	FALSE	TRUE	aff_ms
79869	18729074	FALSE	FALSE	TRUE	aff_ms
10238	18729074	FALSE	FALSE	TRUE	aff_ms
5515	18782753	FALSE	FALSE	TRUE	aff_ms
908	18782753	FALSE	FALSE	TRUE	aff_ms
5518	18782753	FALSE	FALSE	TRUE	aff_ms
26127	18782753	FALSE	FALSE	TRUE	aff_ms
5520	18782753	FALSE	TRUE	TRUE	aff_ms
6801	18782753	FALSE	TRUE	TRUE	aff_ms
5519	18782753	FALSE	FALSE	TRUE	aff_ms
29966	18782753	FALSE	FALSE	TRUE	aff_ms
80143	18782753	FALSE	FALSE	TRUE	aff_ms
5525	18782753	FALSE	FALSE	TRUE	aff_ms
5526	18782753	FALSE	FALSE	TRUE	aff_ms
5527	18782753	FALSE	FALSE	TRUE	aff_ms
5528	18782753	FALSE	FALSE	TRUE	aff_ms
5529	18782753	FALSE	FALSE	TRUE	aff_ms
3476	18782753	FALSE	FALSE	TRUE	aff_ms
83992	18782753	FALSE	FALSE	TRUE	aff_ms
7203	18782753	FALSE	FALSE	TRUE	aff_ms
22948	18782753	FALSE	FALSE	TRUE	aff_ms
55844	18782753	FALSE	FALSE	TRUE	aff_ms
6950	18782753	FALSE	FALSE	TRUE	aff_ms
8499	18782753	FALSE	FALSE	TRUE	aff_ms
8500	18782753	FALSE	FALSE	TRUE	aff_ms
51765	18782753	FALSE	TRUE	TRUE	aff_ms
7871	18782753	FALSE	FALSE	TRUE	aff_ms
29888	18782753	FALSE	FALSE	TRUE	aff_ms
28227	18782753	FALSE	FALSE	TRUE	aff_ms
10693	18782753	FALSE	FALSE	TRUE	aff_ms
10694	18782753	FALSE	FALSE	TRUE	aff_ms
51400	18782753	FALSE	FALSE	TRUE	aff_ms
10574	18782753	FALSE	FALSE	TRUE	aff_ms
10575	18782753	FALSE	FALSE	TRUE	aff_ms
10576	18782753	FALSE	FALSE	TRUE	aff_ms
8655	18782753	FALSE	FALSE	TRUE	aff_ms
8541	18782753	FALSE	FALSE	TRUE	aff_ms
11235	18782753	TRUE	TRUE	TRUE	aff_ms
11116	18782753	FALSE	FALSE	TRUE	aff_ms
55917	18782753	FALSE	FALSE	TRUE	aff_ms
8428	18782753	FALSE	TRUE	TRUE	aff_ms
25843	18782753	FALSE	TRUE	TRUE	aff_ms
57464	18782753	FALSE	TRUE	TRUE	aff_ms
85369	18782753	FALSE	TRUE	TRUE	aff_ms
10494	18782753	FALSE	TRUE	TRUE	aff_ms
10629	19114550	FALSE	FALSE	TRUE	aff_ms
56970	19114550	FALSE	FALSE	TRUE	aff_ms
8464	19114550	FALSE	FALSE	TRUE	aff_ms
8850	19114550	FALSE	TRUE	TRUE	aff_ms
129685	19114550	FALSE	FALSE	TRUE	aff_ms
117143	19114550	FALSE	FALSE	TRUE	aff_ms
55578	19114550	TRUE	TRUE	TRUE	aff_ms
23326	19114550	FALSE	TRUE	TRUE	aff_ms
6314	19114550	FALSE	FALSE	TRUE	aff_ms
93624	19114550	FALSE	FALSE	TRUE	aff_ms
9913	19114550	FALSE	FALSE	TRUE	aff_ms
2648	19114550	FALSE	TRUE	TRUE	aff_ms
27097	19114550	FALSE	FALSE	TRUE	aff_ms
6874	19114550	FALSE	FALSE	TRUE	aff_ms
6873	19114550	FALSE	FALSE	TRUE	aff_ms
6877	19114550	FALSE	FALSE	TRUE	aff_ms
6878	19114550	FALSE	FALSE	TRUE	aff_ms
6880	19114550	FALSE	FALSE	TRUE	aff_ms
6883	19114550	FALSE	FALSE	TRUE	aff_ms
112869	19114550	FALSE	TRUE	TRUE	aff_ms
8295	19114550	FALSE	FALSE	TRUE	aff_ms
10474	19114550	FALSE	FALSE	TRUE	aff_ms
56943	19114550	FALSE	FALSE	TRUE	aff_ms
7874	19182791	FALSE	FALSE	TRUE	aff_ms
6596	19182791	FALSE	TRUE	TRUE	aff_ms
6790	19182791	FALSE	TRUE	TRUE	aff_ms
7431	19182791	FALSE	FALSE	TRUE	aff_ms
4171	19182791	FALSE	FALSE	TRUE	aff_ms
142	19182791	FALSE	FALSE	TRUE	aff_ms
5903	19182791	FALSE	FALSE	TRUE	aff_ms
5111	19182791	FALSE	FALSE	TRUE	aff_ms
3065	19182791	TRUE	TRUE	TRUE	aff_ms
1020	19182791	FALSE	FALSE	TRUE	aff_ms
991	19182791	FALSE	FALSE	TRUE	aff_ms
672	19261748	TRUE	TRUE	TRUE	aff_ms
580	19261748	FALSE	FALSE	TRUE	aff_ms
51720	19261748	FALSE	TRUE	TRUE	aff_ms
9577	19261748	FALSE	TRUE	TRUE	aff_ms
84142	19261748	FALSE	TRUE	TRUE	aff_ms
79184	19261748	FALSE	TRUE	TRUE	aff_ms
29086	19261748	TRUE	TRUE	TRUE	aff_ms
8065	19295130	FALSE	FALSE	TRUE	aff_ms
8450	19295130	FALSE	TRUE	TRUE	aff_ms
8451	19295130	FALSE	FALSE	TRUE	aff_ms
8452	19295130	FALSE	TRUE	TRUE	aff_ms
8453	19295130	FALSE	FALSE	TRUE	aff_ms
8454	19295130	FALSE	TRUE	TRUE	aff_ms
9730	19295130	FALSE	FALSE	TRUE	aff_ms
10116	19295130	FALSE	FALSE	TRUE	aff_ms
11137	19295130	FALSE	FALSE	TRUE	aff_ms
6921	19295130	FALSE	TRUE	TRUE	aff_ms
6923	19295130	FALSE	FALSE	TRUE	aff_ms
163590	19295130	FALSE	FALSE	TRUE	aff_ms
1161	19295130	FALSE	FALSE	TRUE	aff_ms
90379	19295130	FALSE	TRUE	TRUE	aff_ms
122769	19295130	FALSE	FALSE	TRUE	aff_ms
55827	19295130	FALSE	FALSE	TRUE	aff_ms
7316	19295130	FALSE	FALSE	TRUE	aff_ms
55958	19295130	FALSE	FALSE	TRUE	aff_ms
55832	19295130	FALSE	TRUE	TRUE	aff_ms
50717	19295130	FALSE	FALSE	TRUE	aff_ms
4738	19295130	FALSE	FALSE	TRUE	aff_ms
89890	19295130	FALSE	FALSE	TRUE	aff_ms
50813	19295130	FALSE	FALSE	TRUE	aff_ms
79269	19295130	FALSE	FALSE	TRUE	aff_ms
10920	19295130	TRUE	TRUE	TRUE	aff_ms
79016	19295130	TRUE	TRUE	TRUE	aff_ms
83892	19295130	FALSE	FALSE	TRUE	aff_ms
90293	19295130	FALSE	FALSE	TRUE	aff_ms
51514	19295130	FALSE	FALSE	TRUE	aff_ms
51138	19295130	FALSE	FALSE	TRUE	aff_ms
80067	19295130	FALSE	FALSE	TRUE	aff_ms
64708	19295130	FALSE	FALSE	TRUE	aff_ms
64326	19295130	FALSE	FALSE	TRUE	aff_ms
57542	19295130	FALSE	FALSE	TRUE	aff_ms
55626	19295130	FALSE	FALSE	TRUE	aff_ms
84861	19295130	FALSE	FALSE	TRUE	aff_ms
9684	19295130	FALSE	FALSE	TRUE	aff_ms
59349	19295130	FALSE	FALSE	TRUE	aff_ms
8533	19295130	FALSE	FALSE	TRUE	aff_ms
80344	19295130	FALSE	FALSE	TRUE	aff_ms
115290	19295130	FALSE	FALSE	TRUE	aff_ms
53339	19295130	FALSE	FALSE	TRUE	aff_ms
54876	19295130	FALSE	FALSE	TRUE	aff_ms
55643	19295130	FALSE	FALSE	TRUE	aff_ms
6500	19295130	FALSE	FALSE	TRUE	aff_ms
10980	19295130	FALSE	FALSE	TRUE	aff_ms
9318	19295130	FALSE	FALSE	TRUE	aff_ms
1642	19295130	FALSE	FALSE	TRUE	aff_ms
1643	19295130	FALSE	TRUE	TRUE	aff_ms
10987	19295130	FALSE	TRUE	TRUE	aff_ms
23276	19295130	FALSE	FALSE	TRUE	aff_ms
55023	19295130	FALSE	FALSE	TRUE	aff_ms
8816	19295130	FALSE	FALSE	TRUE	aff_ms
51185	19295130	FALSE	FALSE	TRUE	aff_ms
9978	19295130	FALSE	FALSE	TRUE	aff_ms
25853	19295130	FALSE	TRUE	TRUE	aff_ms
[truncated: 790,828 more rows]
